# Supplementary material
Source: PubMed Central journal article supplement (PMC3238469)
Supplement: ajcr0002-0093-st1.pdf [file ajcr0002-0093-st1.pdf]

Supplementary material

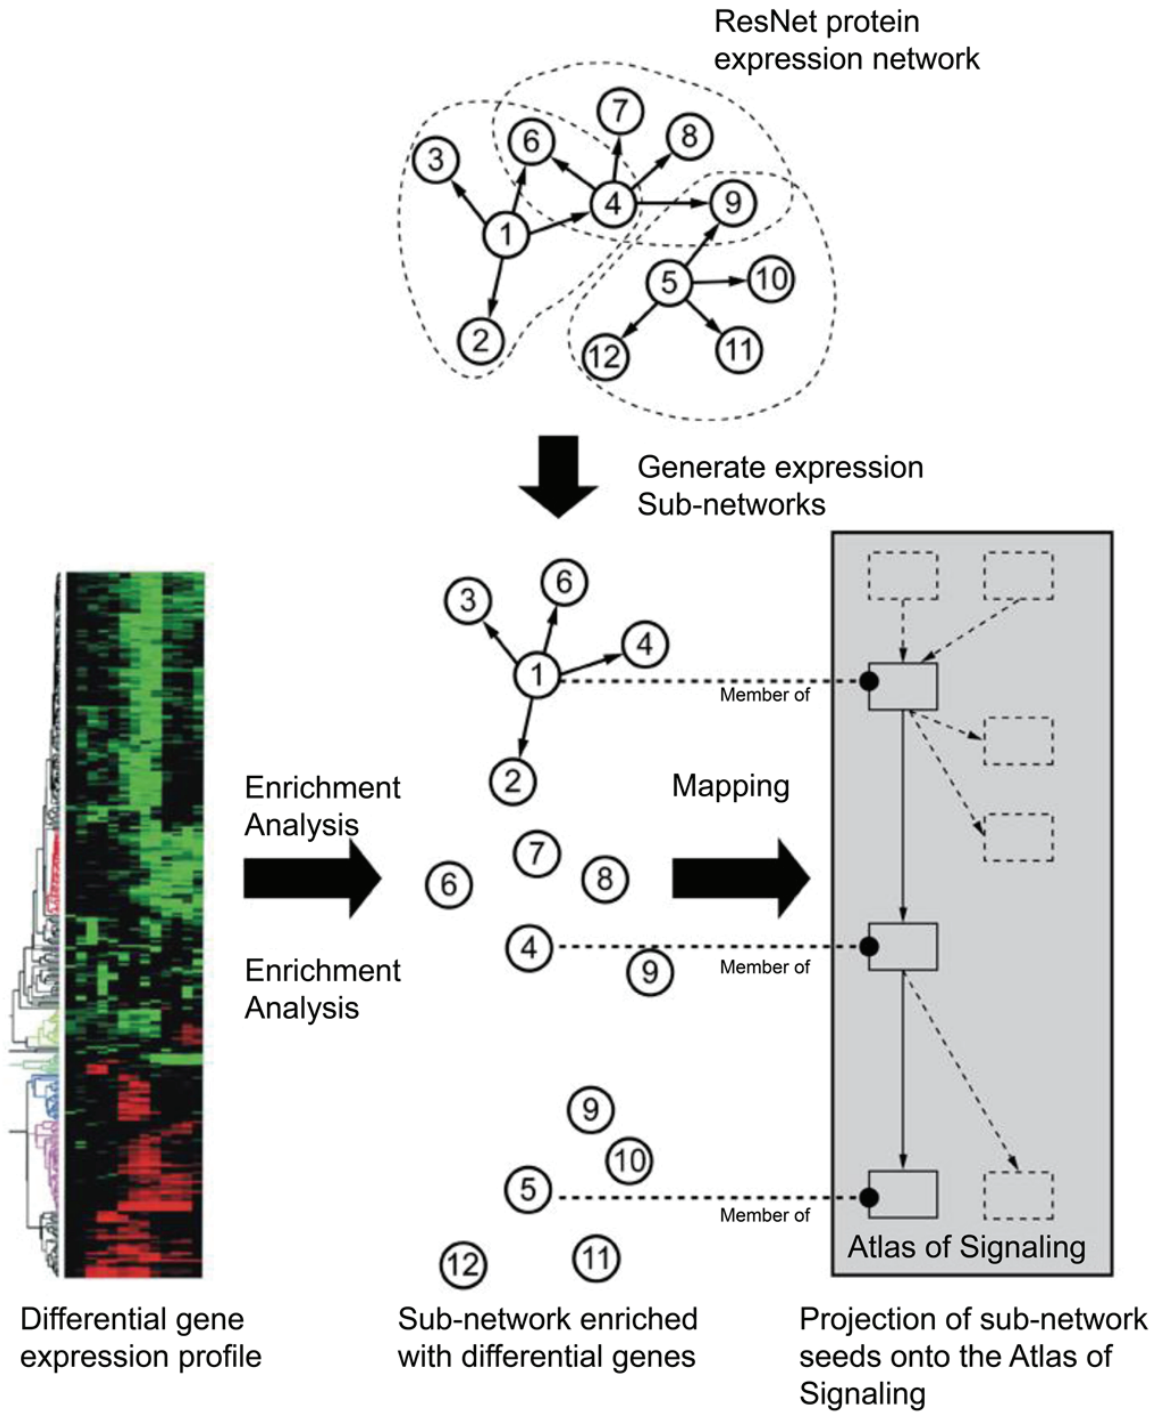

Figure S1. An overview of Sub-Network Enrichment Analysis (SNEA) algorithms

**Table S1.** Differential expression in DNA repair genes

| Name          | Description                                                       | SCC         |                       | ADC         |                       |
|---------------|-------------------------------------------------------------------|-------------|-----------------------|-------------|-----------------------|
|               |                                                                   | fold-change | p-value               | fold-change | p-value               |
| <i>RBBP8</i>  | Retinoblastoma binding protein 8                                  | 2.15        | $9.61 \times 10^{-7}$ | 1.26        | $5.34 \times 10^{-2}$ |
| <i>PRKDC</i>  | Protein kinase, DNA-activated, catalytic polypeptide              | 2.14        | $3.89 \times 10^{-7}$ | 1.45        | $1.10 \times 10^{-3}$ |
| <i>SHFM1</i>  | Split hand/foot malformation (ectrodactyly) type 1                | 2.12        | $1.96 \times 10^{-7}$ | 1.34        | $1.61 \times 10^{-1}$ |
| <i>PCNA</i>   | Proliferating cell nuclear antigen                                | 2.01        | $1.66 \times 10^{-6}$ | 1.43        | $4.79 \times 10^{-4}$ |
| <i>CHEK1</i>  | CHK1 checkpoint homolog ( <i>S. Pombe</i> )                       | 1.97        | $1.33 \times 10^{-5}$ | 1.35        | $1.20 \times 10^{-4}$ |
| <i>FANCI</i>  | Fanconi anemia, complementation group I                           | 1.84        | $2.79 \times 10^{-6}$ | 1.29        | $4.88 \times 10^{-3}$ |
| <i>CHAF1A</i> | Chromatin assembly factor 1, subunit A (p150)                     | 1.82        | $2.55 \times 10^{-7}$ | 1.28        | $1.52 \times 10^{-4}$ |
| <i>EXO1</i>   | Exonuclease 1                                                     | 1.79        | $7.13 \times 10^{-7}$ | 1.36        | $4.29 \times 10^{-4}$ |
| <i>CHEK2</i>  | CHK2 checkpoint homolog ( <i>S. Pombe</i> )                       | 1.73        | $9.38 \times 10^{-6}$ | 1.18        | $1.62 \times 10^{-2}$ |
| <i>APEX1</i>  | APEX nuclease (multifunctional DNA repair enzyme) 1               | 1.73        | $6.67 \times 10^{-7}$ | 1.32        | $2.22 \times 10^{-2}$ |
| <i>BLM</i>    | Bloom syndrome, RecQ helicase-like                                | 1.72        | $8.70 \times 10^{-6}$ | 1.25        | $1.41 \times 10^{-4}$ |
| <i>POLB</i>   | Polymerase (DNA directed), beta                                   | 1.59        | $8.74 \times 10^{-5}$ | 1.28        | $3.57 \times 10^{-2}$ |
| <i>BRCA1</i>  | Breast cancer 1, early onset                                      | 1.56        | $2.13 \times 10^{-5}$ | 1.11        | $1.25 \times 10^{-1}$ |
| <i>PMS2</i>   | PMS2 postmeiotic segregation increased 2 ( <i>S. cerevisiae</i> ) | 1.54        | $3.87 \times 10^{-4}$ | 1.21        | $2.58 \times 10^{-2}$ |
| <i>PARP1</i>  | Poly (ADP-ribose) polymerase 1                                    | 1.54        | $3.11 \times 10^{-4}$ | 1.23        | $4.17 \times 10^{-2}$ |
| <i>CETN2</i>  | Centrin, EF-hand protein, 2                                       | 1.52        | $3.31 \times 10^{-3}$ | -1.06       | $7.41 \times 10^{-1}$ |
| <i>CDK7</i>   | Cyclin-dependent kinase 7                                         | 1.50        | $1.53 \times 10^{-4}$ | 1.09        | $3.01 \times 10^{-1}$ |
| <i>MSH6</i>   | mutS homolog 6 ( <i>E. Coli</i> )                                 | 1.49        | $1.29 \times 10^{-3}$ | 1.05        | $6.09 \times 10^{-1}$ |
| <i>ATR</i>    | Ataxia telangiectasia and Rad3 related                            | 1.46        | $1.50 \times 10^{-4}$ | 1.10        | $2.66 \times 10^{-1}$ |
| <i>UBE2V2</i> | Ubiquitin-conjugating enzyme E2 variant 2                         | 1.45        | $2.00 \times 10^{-5}$ | 1.11        | $1.28 \times 10^{-1}$ |

|               |                                                                         |      |                       |       |                       |
|---------------|-------------------------------------------------------------------------|------|-----------------------|-------|-----------------------|
| <i>FEN1</i>   | Flap structure-specific endonuclease 1                                  | 1.45 | $4.79 \times 10^{-7}$ | 1.39  | $4.18 \times 10^{-7}$ |
| <i>PARP2</i>  | Poly (ADP-ribose) polymerase 2                                          | 1.44 | $2.05 \times 10^{-3}$ | 1.06  | $5.74 \times 10^{-1}$ |
| <i>FANCD2</i> | Fanconi anemia, complementation group D2                                | 1.44 | $6.33 \times 10^{-6}$ | 1.09  | $1.90 \times 10^{-1}$ |
| <i>FANCL</i>  | Fanconi anemia, complementation group L                                 | 1.41 | $3.93 \times 10^{-2}$ | -1.08 | $5.57 \times 10^{-1}$ |
| <i>RAD54B</i> | RAD54 homolog B ( <i>S. cerevisiae</i> )                                | 1.41 | $4.37 \times 10^{-6}$ | 1.15  | $4.16 \times 10^{-3}$ |
| <i>GTF2H3</i> | General transcription factor IIH, polypeptide 3, 34 kDa                 | 1.38 | $1.58 \times 10^{-3}$ | 1.19  | $3.65 \times 10^{-3}$ |
| <i>TDG</i>    | Thymine-DNA glycosylase                                                 | 1.38 | $1.58 \times 10^{-3}$ | 1.16  | $5.83 \times 10^{-2}$ |
| <i>XRCC6</i>  | X-ray repair complementing defective repair in Chinese hamster cells 6  | 1.37 | $1.98 \times 10^{-3}$ | 1.07  | $3.63 \times 10^{-1}$ |
| <i>UNG</i>    | Uracil-DNA glycosylase                                                  | 1.36 | $1.67 \times 10^{-5}$ | 1.13  | $5.20 \times 10^{-2}$ |
| <i>MSH2</i>   | mutS homolog 2, colon cancer, nonpolyposis type 1 ( <i>E. Coli</i> )    | 1.36 | $9.78 \times 10^{-3}$ | 1.26  | $1.49 \times 10^{-3}$ |
| <i>DDB1</i>   | Damage-specific DNA binding protein 1, 127 kDa                          | 1.36 | $2.18 \times 10^{-3}$ | 1.12  | $2.29 \times 10^{-1}$ |
| <i>OBFC2B</i> | Oligonucleotide/oligosaccharide-binding fold containing 2B              | 1.35 | $1.63 \times 10^{-4}$ | 1.15  | $9.60 \times 10^{-3}$ |
| <i>XRCC4</i>  | X-ray repair complementing defective repair in Chinese hamster cells 4  | 1.34 | $3.81 \times 10^{-3}$ | 1.13  | $1.12 \times 10^{-1}$ |
| <i>TDP1</i>   | Tyrosyl-DNA phosphodiesterase 1                                         | 1.29 | $1.75 \times 10^{-4}$ | 1.13  | $2.73 \times 10^{-2}$ |
| <i>PALB2</i>  | Partner and localizer of BRCA2                                          | 1.28 | $1.88 \times 10^{-3}$ | 1.05  | $3.43 \times 10^{-1}$ |
| <i>GTF2H1</i> | General transcription factor IIH, polypeptide 1, 62 kDa                 | 1.27 | $5.39 \times 10^{-2}$ | 1.13  | $1.53 \times 10^{-1}$ |
| <i>PMS2L3</i> | Postmeiotic segregation increased 2-like 3                              | 1.27 | $2.48 \times 10^{-2}$ | 1.28  | $1.76 \times 10^{-2}$ |
| <i>APTX</i>   | Aprataxin                                                               | 1.26 | $2.40 \times 10^{-3}$ | 1.09  | $1.33 \times 10^{-1}$ |
| <i>MNAT1</i>  | Menage a trois homolog 1, cyclin H assembly factor ( <i>X. laevis</i> ) | 1.26 | $1.54 \times 10^{-2}$ | -1.01 | $8.98 \times 10^{-1}$ |
| <i>RAD51</i>  | RAD51 homolog (RecA homolog, <i>E. Coli</i> ) ( <i>S. cerevisiae</i> )  | 1.25 | $4.56 \times 10^{-3}$ | 1.14  | $2.94 \times 10^{-2}$ |
| <i>FANCF</i>  | Fanconi anemia,                                                         | 1.24 | $3.57 \times 10^{-3}$ | 1.11  | $5.48 \times 10^{-2}$ |

|                |                                                                                                                                 |      |                       |       |                       |
|----------------|---------------------------------------------------------------------------------------------------------------------------------|------|-----------------------|-------|-----------------------|
|                | complementation group F                                                                                                         |      |                       |       |                       |
| <i>DCLRE1A</i> | DNA cross-link repair 1A (PSO2 homolog, <i>S. cerevisiae</i> )                                                                  | 1.24 | $2.93 \times 10^{-3}$ | 1.19  | $1.59 \times 10^{-3}$ |
| <i>RAD51C</i>  | RAD51 homolog C ( <i>S. cerevisiae</i> )                                                                                        | 1.24 | $3.84 \times 10^{-3}$ | 1.06  | $3.43 \times 10^{-1}$ |
| <i>RECQL</i>   | RecQ protein-like (DNA helicase Q1-like)                                                                                        | 1.24 | $3.15 \times 10^{-2}$ | 1.04  | $5.70 \times 10^{-1}$ |
| <i>WRN</i>     | Werner syndrome, RecQ helicase-like                                                                                             | 1.23 | $7.64 \times 10^{-2}$ | -1.28 | $1.76 \times 10^{-3}$ |
| <i>XRCC5</i>   | X-ray repair complementing defective repair in Chinese hamster cells 5 (double-strand-break rejoining)                          | 1.22 | $2.27 \times 10^{-2}$ | -1.02 | $8.53 \times 10^{-1}$ |
| <i>RAD18</i>   | RAD18 homolog ( <i>S. cerevisiae</i> )                                                                                          | 1.22 | $1.58 \times 10^{-4}$ | 1.12  | $1.57 \times 10^{-2}$ |
| <i>ERCC6</i>   | Excision repair cross-complementing rodent repair deficiency, complementation group 6                                           | 1.20 | $1.10 \times 10^{-2}$ | -1.03 | $6.42 \times 10^{-1}$ |
| <i>POLQ</i>    | Polymerase (DNA directed), theta                                                                                                | 1.20 | $1.45 \times 10^{-2}$ | 1.05  | $3.89 \times 10^{-1}$ |
| <i>CLK2</i>    | CDC-like kinase 2                                                                                                               | 1.19 | $6.15 \times 10^{-3}$ | 1.27  | $1.55 \times 10^{-4}$ |
| <i>FANCE</i>   | Fanconi anemia, complementation group E                                                                                         | 1.18 | $4.80 \times 10^{-3}$ | 1.04  | $3.84 \times 10^{-1}$ |
| <i>FANCA</i>   | Fanconi anemia, complementation group A                                                                                         | 1.18 | $2.57 \times 10^{-3}$ | 1.15  | $3.99 \times 10^{-3}$ |
| <i>NUDT1</i>   | nudix (nucleoside diphosphate linked moiety X)-type motif 1                                                                     | 1.18 | $1.23 \times 10^{-3}$ | 1.15  | $1.33 \times 10^{-2}$ |
| <i>DUT</i>     | Deoxyuridine triphosphatase                                                                                                     | 1.18 | $4.96 \times 10^{-3}$ | 1.08  | $2.18 \times 10^{-1}$ |
| <i>TP53</i>    | tumor protein p53                                                                                                               | 1.18 | $6.27 \times 10^{-2}$ | 1.09  | $1.88 \times 10^{-1}$ |
| <i>RAD54L</i>  | RAD54-like ( <i>S. cerevisiae</i> )                                                                                             | 1.18 | $5.95 \times 10^{-3}$ | 1.16  | $9.38 \times 10^{-3}$ |
| <i>EME1</i>    | Essential meiotic endonuclease 1 homolog 1 ( <i>S. Pombe</i> )                                                                  | 1.17 | $2.57 \times 10^{-3}$ | 1.14  | $3.56 \times 10^{-2}$ |
| <i>ERCC1</i>   | Excision repair cross-complementing rodent repair deficiency, complementation group 1 (includes overlapping antisense sequence) | 1.17 | $6.47 \times 10^{-4}$ | 1.03  | $5.51 \times 10^{-1}$ |
| <i>RAD23B</i>  | RAD23 homolog B ( <i>S. cerevisiae</i> )                                                                                        | 1.17 | $7.37 \times 10^{-2}$ | 1.09  | $2.50 \times 10^{-1}$ |
| <i>BRCA2</i>   | breast cancer 2, early onset                                                                                                    | 1.17 | $1.61 \times 10^{-2}$ | 1.02  | $6.07 \times 10^{-1}$ |

|               |                                                                        |      |                       |       |                       |
|---------------|------------------------------------------------------------------------|------|-----------------------|-------|-----------------------|
| <i>SMUG1</i>  | single-strand-selective monofunctional uracil-DNA glycosylase 1        | 1.16 | $1.41 \times 10^{-2}$ | 1.12  | $3.81 \times 10^{-2}$ |
| <i>MSH5</i>   | mutS homolog 5 ( <i>E. Coli</i> )                                      | 1.16 | $2.48 \times 10^{-3}$ | 1.10  | $7.79 \times 10^{-2}$ |
| <i>NBN</i>    | Nibrin                                                                 | 1.16 | $2.26 \times 10^{-1}$ | 1.10  | $3.12 \times 10^{-1}$ |
| <i>FANCG</i>  | Fanconi anemia, complementation group G                                | 1.16 | $5.29 \times 10^{-4}$ | 1.10  | $7.89 \times 10^{-2}$ |
| <i>LIG3</i>   | Ligase III, DNA, ATP-dependent                                         | 1.16 | $2.82 \times 10^{-2}$ | 1.15  | $6.57 \times 10^{-3}$ |
| <i>RAD1</i>   | RAD1 homolog ( <i>S. Pombe</i> )                                       | 1.15 | $3.82 \times 10^{-2}$ | 1.14  | $5.71 \times 10^{-2}$ |
| <i>RAD50</i>  | RAD50 homolog ( <i>S. cerevisiae</i> )                                 | 1.15 | $3.50 \times 10^{-1}$ | -1.14 | $3.96 \times 10^{-1}$ |
| <i>FANCB</i>  | Fanconi anemia, complementation group B                                | 1.14 | $4.52 \times 10^{-2}$ | 1.17  | $1.22 \times 10^{-2}$ |
| <i>DDB2</i>   | Damage-specific DNA binding protein 2, 48 kDa                          | 1.14 | $3.45 \times 10^{-2}$ | 1.15  | $4.07 \times 10^{-3}$ |
| <i>GTF2H5</i> | General transcription factor IIH, polypeptide 5                        | 1.14 | $7.73 \times 10^{-2}$ | 1.11  | $2.18 \times 10^{-1}$ |
| <i>RAD23A</i> | RAD23 homolog A ( <i>S. cerevisiae</i> )                               | 1.13 | $1.05 \times 10^{-1}$ | 1.03  | $6.54 \times 10^{-1}$ |
| <i>POLE</i>   | Polymerase (DNA directed), epsilon                                     | 1.12 | $2.41 \times 10^{-2}$ | 1.05  | $3.21 \times 10^{-1}$ |
| <i>XRCC1</i>  | X-ray repair complementing defective repair in Chinese hamster cells 1 | 1.11 | $3.77 \times 10^{-2}$ | 1.13  | $2.74 \times 10^{-3}$ |
| <i>MRE11A</i> | MRE11 meiotic recombination 11 homolog A ( <i>S. cerevisiae</i> )      | 1.10 | $4.23 \times 10^{-1}$ | 1.05  | $6.12 \times 10^{-1}$ |
| <i>FANCM</i>  | Fanconi anemia, complementation group M                                | 1.10 | $7.10 \times 10^{-2}$ | -1.02 | $6.83 \times 10^{-1}$ |
| <i>APEX2</i>  | APEX nuclease (apurinic/apyrimidinic endonuclease) 2                   | 1.10 | $5.71 \times 10^{-2}$ | 1.05  | $2.46 \times 10^{-1}$ |
| <i>PMS1</i>   | PMS1 postmeiotic segregation increased 1 ( <i>S. cerevisiae</i> )      | 1.10 | $7.01 \times 10^{-2}$ | 1.09  | $6.87 \times 10^{-2}$ |
| <i>LIG1</i>   | Ligase I, DNA, ATP-dependent                                           | 1.09 | $4.08 \times 10^{-2}$ | 1.12  | $5.11 \times 10^{-3}$ |
| <i>NEIL3</i>  | nei endonuclease VIII-like 3 ( <i>E. Coli</i> )                        | 1.09 | $9.13 \times 10^{-2}$ | 1.12  | $6.20 \times 10^{-2}$ |
| <i>RPA1</i>   | Replication protein A1, 70 kDa                                         | 1.08 | $2.72 \times 10^{-2}$ | 1.08  | $4.27 \times 10^{-2}$ |
| <i>ALKBH2</i> | alkB, alkylation repair homolog 2                                      | 1.08 | $1.96 \times 10^{-1}$ | 1.02  | $7.80 \times 10^{-1}$ |

|                |                                                                                                                                     |      |                       |       |                       |
|----------------|-------------------------------------------------------------------------------------------------------------------------------------|------|-----------------------|-------|-----------------------|
|                | ( <i>E. Coli</i> )                                                                                                                  |      |                       |       |                       |
| <i>ALKBH3</i>  | alkB, alkylation repair homolog 3 ( <i>E. Coli</i> )                                                                                | 1.08 | $1.79 \times 10^{-1}$ | 1.08  | $2.22 \times 10^{-1}$ |
| <i>HUS1</i>    | HUS1 checkpoint homolog ( <i>S. Pombe</i> )                                                                                         | 1.08 | $2.59 \times 10^{-1}$ | 1.03  | $7.19 \times 10^{-1}$ |
| <i>UBE2A</i>   | Ubiquitin-conjugating enzyme E2A (RAD6 homolog)                                                                                     | 1.08 | $2.09 \times 10^{-1}$ | -1.01 | $8.50 \times 10^{-1}$ |
| <i>ERCC4</i>   | Excision repair cross-complementing rodent repair deficiency, complementation group 4                                               | 1.07 | $2.51 \times 10^{-1}$ | 1.06  | $3.21 \times 10^{-1}$ |
| <i>MBD4</i>    | Methyl-CpG binding domain protein 4                                                                                                 | 1.07 | $4.14 \times 10^{-1}$ | 1.11  | $5.74 \times 10^{-2}$ |
| <i>MAD2L2</i>  | MAD2 mitotic arrest deficient-like 2 (yeast)                                                                                        | 1.07 | $2.13 \times 10^{-1}$ | 1.12  | $3.10 \times 10^{-2}$ |
| <i>LIG4</i>    | Ligase IV, DNA, ATP-dependent                                                                                                       | 1.06 | $3.15 \times 10^{-1}$ | 1.11  | $7.92 \times 10^{-2}$ |
| <i>RAD52</i>   | RAD52 homolog ( <i>S. cerevisiae</i> )                                                                                              | 1.06 | $3.06 \times 10^{-1}$ | -1.05 | $2.82 \times 10^{-1}$ |
| <i>MDC1</i>    | Mediator of DNA damage checkpoint 1                                                                                                 | 1.06 | $4.24 \times 10^{-1}$ | 1.03  | $6.25 \times 10^{-1}$ |
| <i>MUTYH</i>   | mutY homolog ( <i>E. Coli</i> )                                                                                                     | 1.06 | $2.57 \times 10^{-1}$ | 1.05  | $3.47 \times 10^{-1}$ |
| <i>RPA3</i>    | Replication protein A3, 14 kDa                                                                                                      | 1.06 | $2.83 \times 10^{-1}$ | 1.14  | $5.66 \times 10^{-3}$ |
| <i>POLH</i>    | Polymerase (DNA directed), eta                                                                                                      | 1.06 | $4.73 \times 10^{-1}$ | 1.11  | $2.02 \times 10^{-1}$ |
| <i>POLN</i>    | Polymerase (DNA directed) nu                                                                                                        | 1.05 | $2.92 \times 10^{-1}$ | 1.12  | $1.98 \times 10^{-2}$ |
| <i>GTF2H4</i>  | General transcription factor IIH, polypeptide 4, 52 kDa                                                                             | 1.05 | $1.64 \times 10^{-1}$ | 1.06  | $2.92 \times 10^{-1}$ |
| <i>DCLRE1C</i> | DNA cross-link repair 1C (PSO2 homolog, <i>S. cerevisiae</i> )                                                                      | 1.05 | $4.68 \times 10^{-1}$ | 1.20  | $1.05 \times 10^{-3}$ |
| <i>XAB2</i>    | XPA binding protein 2                                                                                                               | 1.04 | $4.75 \times 10^{-1}$ | 1.07  | $1.75 \times 10^{-1}$ |
| <i>H2AFX</i>   | H2A histone family, member X                                                                                                        | 1.04 | $4.13 \times 10^{-1}$ | 1.25  | $4.58 \times 10^{-6}$ |
| <i>ERCC3</i>   | Excision repair cross-complementing rodent repair deficiency, complementation group 3 (xeroderma pigmentosum group B complementing) | 1.04 | $6.20 \times 10^{-1}$ | -1.05 | $5.19 \times 10^{-1}$ |
| <i>RAD51L1</i> | RAD51-like 1 ( <i>S. cerevisiae</i> )                                                                                               | 1.04 | $5.92 \times 10^{-1}$ | 1.06  | $3.94 \times 10^{-1}$ |
| <i>XRCC3</i>   | X-ray repair complementing defective repair in Chinese                                                                              | 1.04 | $4.91 \times 10^{-1}$ | 1.18  | $2.41 \times 10^{-3}$ |

|                |                                                                                       |       |                       |       |                       |
|----------------|---------------------------------------------------------------------------------------|-------|-----------------------|-------|-----------------------|
|                | hamster cells 3                                                                       |       |                       |       |                       |
| <i>RPA2</i>    | replication protein A2, 32 kDa                                                        | 1.04  | $6.87 \times 10^{-1}$ | 1.02  | $8.38 \times 10^{-1}$ |
| <i>ATM</i>     | ataxia telangiectasia mutated                                                         | 1.04  | $7.26 \times 10^{-1}$ | -1.21 | $7.93 \times 10^{-2}$ |
| <i>RAD17</i>   | RAD17 homolog ( <i>S. Pombe</i> )                                                     | 1.04  | $6.98 \times 10^{-1}$ | 1.21  | $1.44 \times 10^{-2}$ |
| <i>REV1</i>    | REV1 homolog ( <i>S. cerevisiae</i> )                                                 | 1.03  | $6.98 \times 10^{-1}$ | -1.09 | $2.49 \times 10^{-1}$ |
| <i>RAD51L3</i> | RAD51-like 3 ( <i>S. cerevisiae</i> )                                                 | 1.03  | $5.07 \times 10^{-1}$ | 1.06  | $2.89 \times 10^{-1}$ |
| <i>UBE2B</i>   | Ubiquitin-conjugating enzyme E2B (RAD6 homolog)                                       | 1.03  | $6.85 \times 10^{-1}$ | -1.20 | $7.78 \times 10^{-2}$ |
| <i>RDM1</i>    | RAD52 motif 1                                                                         | 1.02  | $6.46 \times 10^{-1}$ | 1.16  | $4.44 \times 10^{-3}$ |
| <i>MSH4</i>    | mutS homolog 4 ( <i>E. Coli</i> )                                                     | 1.02  | $7.35 \times 10^{-1}$ | 1.00  | $9.38 \times 10^{-1}$ |
| <i>RECQL4</i>  | RecQ protein-like 4                                                                   | 1.02  | $6.92 \times 10^{-1}$ | 1.12  | $3.02 \times 10^{-2}$ |
| <i>ERCC2</i>   | Excision repair cross-complementing rodent repair deficiency, complementation group 2 | 1.01  | $8.80 \times 10^{-1}$ | 1.18  | $8.45 \times 10^{-4}$ |
| <i>NTHL1</i>   | nth endonuclease III-like 1 ( <i>E. Coli</i> )                                        | 1.00  | $9.79 \times 10^{-1}$ | 1.07  | $1.54 \times 10^{-1}$ |
| <i>POLM</i>    | Polymerase (DNA directed), mu                                                         | -1.00 | $9.79 \times 10^{-1}$ | 1.07  | $1.53 \times 10^{-1}$ |
| <i>MSH3</i>    | mutS homolog 3 ( <i>E. Coli</i> )                                                     | -1.00 | $9.80 \times 10^{-1}$ | -1.00 | $9.47 \times 10^{-1}$ |
| <i>ERCC5</i>   | Excision repair cross-complementing rodent repair deficiency, complementation group 5 | -1.00 | $9.70 \times 10^{-1}$ | -1.32 | $2.85 \times 10^{-3}$ |
| <i>EME2</i>    | Essential meiotic endonuclease 1 homolog 2 ( <i>S. Pombe</i> )                        | -1.01 | $8.17 \times 10^{-1}$ | -1.02 | $6.86 \times 10^{-1}$ |
| <i>PNKP</i>    | Polynucleotide kinase 3'-phosphatase                                                  | -1.01 | $7.46 \times 10^{-1}$ | 1.14  | $4.45 \times 10^{-3}$ |
| <i>XPA</i>     | Xeroderma pigmentosum, complementation group A                                        | -1.01 | $8.65 \times 10^{-1}$ | -1.08 | $2.43 \times 10^{-1}$ |
| <i>POLD1</i>   | Polymerase (DNA directed), delta 1, catalytic subunit 125 kDa                         | -1.02 | $7.40 \times 10^{-1}$ | 1.05  | $3.27 \times 10^{-1}$ |
| <i>TREX2</i>   | Three prime repair exonuclease 2                                                      | -1.02 | $6.83 \times 10^{-1}$ | 1.10  | $9.88 \times 10^{-2}$ |
| <i>POLL</i>    | Polymerase (DNA directed), lambda                                                     | -1.02 | $6.14 \times 10^{-1}$ | 1.03  | $6.11 \times 10^{-1}$ |
| <i>MMS19</i>   | MMS19 nucleotide excision repair                                                      | -1.02 | $5.25 \times 10^{-1}$ | -1.03 | $4.03 \times 10^{-1}$ |

|                |                                                                                           |       |                       |       |                       |
|----------------|-------------------------------------------------------------------------------------------|-------|-----------------------|-------|-----------------------|
|                | homolog ( <i>S. cerevisiae</i> )                                                          |       |                       |       |                       |
| <i>MPG</i>     | N-methylpurine-DNA glycosylase                                                            | -1.03 | $4.49 \times 10^{-1}$ | 1.11  | $2.26 \times 10^{-3}$ |
| <i>RAD9A</i>   | RAD9 homolog A ( <i>S. Pombe</i> )                                                        | -1.03 | $5.52 \times 10^{-1}$ | 1.06  | $2.13 \times 10^{-1}$ |
| <i>TREX1</i>   | Three prime repair exonuclease 1                                                          | -1.03 | $4.99 \times 10^{-1}$ | -1.06 | $2.04 \times 10^{-1}$ |
| <i>MUS81</i>   | MUS81 endonuclease homolog ( <i>S. cerevisiae</i> )                                       | -1.04 | $4.33 \times 10^{-1}$ | 1.10  | $3.02 \times 10^{-2}$ |
| <i>OGG1</i>    | 8-oxoguanine DNA glycosylase                                                              | -1.05 | $3.02 \times 10^{-1}$ | 1.08  | $8.32 \times 10^{-2}$ |
| <i>RECQL5</i>  | RecQ protein-like 5                                                                       | -1.05 | $2.99 \times 10^{-1}$ | 1.11  | $4.41 \times 10^{-2}$ |
| <i>POLI</i>    | Polymerase (DNA directed) iota                                                            | -1.05 | $6.10 \times 10^{-1}$ | -1.12 | $3.06 \times 10^{-1}$ |
| <i>DCLRE1B</i> | DNA cross-link repair 1B (PSO2 homolog, <i>S. cerevisiae</i> )                            | -1.06 | $4.75 \times 10^{-1}$ | 1.11  | $1.35 \times 10^{-1}$ |
| <i>DMC1</i>    | DMC1 dosage suppressor of mck1 homolog, meiosis-specific homologous recombination (yeast) | -1.06 | $2.82 \times 10^{-1}$ | 1.07  | $2.07 \times 10^{-1}$ |
| <i>NEIL2</i>   | nei like 2 ( <i>E. Coli</i> )                                                             | -1.07 | $1.90 \times 10^{-1}$ | 1.11  | $3.17 \times 10^{-2}$ |
| <i>POLK</i>    | Polymerase (DNA directed) kappa                                                           | -1.07 | $5.64 \times 10^{-1}$ | -1.24 | $3.58 \times 10^{-2}$ |
| <i>ERCC8</i>   | Excision repair cross-complementing rodent repair deficiency, complementation group 8     | -1.09 | $1.59 \times 10^{-1}$ | 1.05  | $3.57 \times 10^{-1}$ |
| <i>MGMT</i>    | O-6-methylguanine-DNA methyltransferase                                                   | -1.09 | $8.14 \times 10^{-2}$ | 1.05  | $1.79 \times 10^{-1}$ |
| <i>UBE2N</i>   | Ubiquitin-conjugating enzyme E2N (UBC13 homolog, yeast)                                   | -1.09 | $1.84 \times 10^{-1}$ | -1.11 | $8.47 \times 10^{-2}$ |
| <i>GTF2H2</i>  | General transcription factor IIH, polypeptide 2, 44 kDa                                   | -1.10 | $5.17 \times 10^{-1}$ | -1.20 | $2.56 \times 10^{-1}$ |
| <i>Hel308</i>  | Helicase, POLQ-like                                                                       | -1.11 | $1.45 \times 10^{-1}$ | -1.05 | $3.62 \times 10^{-1}$ |
| <i>SPO11</i>   | SPO11 meiotic protein covalently bound to DSB homolog ( <i>S. cerevisiae</i> )            | -1.11 | $1.26 \times 10^{-1}$ | 1.01  | $7.93 \times 10^{-1}$ |
| <i>MLH1</i>    | mutL homolog 1, colon cancer, nonpolyposis type 2 ( <i>E. Coli</i> )                      | -1.12 | $1.27 \times 10^{-1}$ | -1.23 | $2.00 \times 10^{-3}$ |
| <i>POLG</i>    | polymerase (DNA directed), gamma                                                          | -1.12 | $1.54 \times 10^{-2}$ | 1.03  | $5.51 \times 10^{-1}$ |
| <i>RRM2B</i>   | Ribonucleotide reductase M2 B                                                             | -1.13 | $8.62 \times 10^{-2}$ | 1.09  | $2.92 \times 10^{-1}$ |



|                      |                                                                        |       |                       |       |                       |
|----------------------|------------------------------------------------------------------------|-------|-----------------------|-------|-----------------------|
|                      | (TP53 inducible)                                                       |       |                       |       |                       |
| <i>RPA4</i>          | Replication protein A4, 34 kDa                                         | -1.14 | $2.69 \times 10^{-2}$ | -1.11 | $4.93 \times 10^{-2}$ |
| <i>NEIL1</i>         | nei endonuclease VIII-like 1 ( <i>E. Coli</i> )                        | -1.14 | $2.79 \times 10^{-2}$ | -1.04 | $4.78 \times 10^{-1}$ |
| <i>XPC</i>           | Xeroderma pigmentosum, complementation group C                         | -1.14 | $2.71 \times 10^{-2}$ | -1.11 | $1.05 \times 10^{-1}$ |
| <i>MLH3</i>          | mutL homolog 3 ( <i>E. Coli</i> )                                      | -1.16 | $1.25 \times 10^{-2}$ | -1.10 | $1.44 \times 10^{-1}$ |
| <i>FANCC</i>         | Fanconi anemia, complementation group C                                | -1.21 | $3.49 \times 10^{-3}$ | -1.14 | $2.08 \times 10^{-2}$ |
| <i>REV3L</i>         | REV3-like, catalytic subunit of DNA polymerase zeta (yeast)            | -1.25 | $1.14 \times 10^{-2}$ | -1.19 | $3.02 \times 10^{-2}$ |
| <i>PER1</i>          | Period homolog 1 ( <i>Drosophila</i> )                                 | -1.37 | $5.61 \times 10^{-6}$ | -1.19 | $7.80 \times 10^{-3}$ |
| <i>CCNH</i>          | Cyclin H                                                               | -1.69 | $1.94 \times 10^{-4}$ | -1.50 | $1.66 \times 10^{-2}$ |
| <i>A730011L01Rik</i> | Hypothetical protein FLJ35220                                          |       |                       |       |                       |
| <i>GEN1</i>          | Gen homolog 1, endonuclease ( <i>Drosophila</i> )                      |       |                       |       |                       |
| <i>PMS2L4</i>        | Postmeiotic segregation increased 2-like 4 pseudogene                  |       |                       |       |                       |
| <i>ATRIP</i>         | ATR interacting protein                                                |       |                       |       |                       |
| <i>XRCC2</i>         | X-ray repair complementing defective repair in Chinese hamster cells 2 |       |                       |       |                       |
| <i>C19orf40</i>      | Chromosome 19 open reading frame 40                                    |       |                       |       |                       |

**Table S2.** Differential changes in cell cycle genes

| Name          | Description                                                                   | SCC         |                        | ADC         |                       |
|---------------|-------------------------------------------------------------------------------|-------------|------------------------|-------------|-----------------------|
|               |                                                                               | fold-change | p-value                | fold-change | p-value               |
| <i>TOP2A</i>  | Topoisomerase (DNA) II alpha 170 kDa                                          | 5.43        | $1.23 \times 10^{-11}$ | 2.92        | $7.95 \times 10^{-9}$ |
| <i>CCNB1</i>  | Cyclin B1                                                                     | 2.75        | $6.97 \times 10^{-8}$  | 1.56        | $4.82 \times 10^{-5}$ |
| <i>MELK</i>   | Maternal embryonic leucine zipper kinase                                      | 2.67        | $1.75 \times 10^{-7}$  | 1.45        | $3.21 \times 10^{-6}$ |
| <i>MAD2L1</i> | MAD2 mitotic arrest deficient-like 1 (yeast)                                  | 2.63        | $4.69 \times 10^{-9}$  | 1.38        | $2.05 \times 10^{-4}$ |
| <i>SFN</i>    | Stratifin                                                                     | 2.60        | $1.94 \times 10^{-7}$  | 1.43        | $1.28 \times 10^{-5}$ |
| <i>CDC6</i>   | Cell division cycle 6 homolog ( <i>S. cerevisiae</i> )                        | 2.54        | $3.24 \times 10^{-9}$  | 1.54        | $2.40 \times 10^{-4}$ |
| <i>ASPM</i>   | asp (abnormal spindle) homolog, microcephaly associated ( <i>Drosophila</i> ) | 2.48        | $1.45 \times 10^{-7}$  | 1.57        | $7.97 \times 10^{-5}$ |
| <i>TOPBP1</i> | Topoisomerase (DNA) II binding protein 1                                      | 2.02        | $5.03 \times 10^{-6}$  | 1.18        | $4.88 \times 10^{-2}$ |
| <i>CHEK1</i>  | CHK1 checkpoint homolog ( <i>S. Pombe</i> )                                   | 1.97        | $1.33 \times 10^{-5}$  | 1.35        | $1.20 \times 10^{-4}$ |
| <i>CCNB2</i>  | Cyclin B2                                                                     | 1.93        | $1.69 \times 10^{-6}$  | 1.30        | $5.87 \times 10^{-4}$ |
| <i>CDC2</i>   | Cell division cycle 2, G1 to S and G2 to M                                    | 1.84        | $2.57 \times 10^{-6}$  | 1.37        | $7.20 \times 10^{-5}$ |
| <i>EZH2</i>   | Enhancer of zeste homolog 2 ( <i>Drosophila</i> )                             | 1.78        | $6.05 \times 10^{-8}$  | 1.24        | $8.23 \times 10^{-3}$ |
| <i>CHEK2</i>  | CHK2 checkpoint homolog ( <i>S. Pombe</i> )                                   | 1.73        | $9.38 \times 10^{-6}$  | 1.18        | $1.62 \times 10^{-2}$ |
| <i>CDK4</i>   | Cyclin-dependent kinase 4                                                     | 1.70        | $3.64 \times 10^{-6}$  | 1.34        | $3.85 \times 10^{-3}$ |
| <i>GMNN</i>   | Geminin, DNA replication inhibitor                                            | 1.65        | $1.07 \times 10^{-4}$  | 1.16        | $5.31 \times 10^{-2}$ |
| <i>NAE1</i>   | NEDD8 activating enzyme E1 subunit 1                                          | 1.59        | $1.64 \times 10^{-3}$  | 1.10        | $3.85 \times 10^{-1}$ |
| <i>BRCA1</i>  | Breast cancer 1, early onset                                                  | 1.56        | $2.13 \times 10^{-5}$  | 1.11        | $1.25 \times 10^{-1}$ |
| <i>CDK6</i>   | Cyclin-dependent kinase 6                                                     | 1.47        | $2.86 \times 10^{-3}$  | -1.03       | $6.09 \times 10^{-1}$ |
| <i>ATR</i>    | Ataxia telangiectasia and Rad3 related                                        | 1.46        | $1.50 \times 10^{-4}$  | 1.10        | $2.66 \times 10^{-1}$ |

|                |                                                                        |      |                       |       |                       |
|----------------|------------------------------------------------------------------------|------|-----------------------|-------|-----------------------|
| <i>FANCD2</i>  | Fanconi anemia, complementation group D2                               | 1.44 | $6.33 \times 10^{-6}$ | 1.09  | $1.90 \times 10^{-1}$ |
| <i>HDAC1</i>   | Histone deacetylase 1                                                  | 1.44 | $1.11 \times 10^{-3}$ | 1.12  | $3.54 \times 10^{-1}$ |
| <i>MSH2</i>    | mutS homolog 2, colon cancer, nonpolyposis type 1 ( <i>E. Coli</i> )   | 1.36 | $9.78 \times 10^{-3}$ | 1.26  | $1.49 \times 10^{-3}$ |
| <i>BIRC5</i>   | Baculoviral IAP repeat-containing 5                                    | 1.35 | $1.93 \times 10^{-7}$ | 1.26  | $1.52 \times 10^{-4}$ |
| <i>BARD1</i>   | BRCA1 associated RING domain 1                                         | 1.33 | $9.99 \times 10^{-4}$ | -1.04 | $3.95 \times 10^{-1}$ |
| <i>CDKN2A</i>  | Cyclin-dependent kinase inhibitor 2A (melanoma, p16, inhibits CDK4)    | 1.32 | $2.06 \times 10^{-2}$ | 1.26  | $1.15 \times 10^{-3}$ |
| <i>RAD51</i>   | RAD51 homolog (RecA homolog, <i>E. Coli</i> ) ( <i>S. cerevisiae</i> ) | 1.25 | $4.56 \times 10^{-3}$ | 1.14  | $2.94 \times 10^{-2}$ |
| <i>TBPL1</i>   | TBP-like 1                                                             | 1.23 | $1.50 \times 10^{-2}$ | -1.07 | $3.51 \times 10^{-1}$ |
| <i>RINT1</i>   | RAD50 interactor 1                                                     | 1.21 | $4.38 \times 10^{-3}$ | 1.03  | $5.78 \times 10^{-1}$ |
| <i>FANCA</i>   | Fanconi anemia, complementation group A                                | 1.18 | $2.57 \times 10^{-3}$ | 1.15  | $3.99 \times 10^{-3}$ |
| <i>TP53</i>    | Tumor protein p53                                                      | 1.18 | $6.27 \times 10^{-2}$ | 1.09  | $1.88 \times 10^{-1}$ |
| <i>CDC25A</i>  | Cell division cycle 25 homolog A ( <i>S. Pombe</i> )                   | 1.17 | $1.92 \times 10^{-3}$ | 1.05  | $5.00 \times 10^{-1}$ |
| <i>BRCA2</i>   | Breast cancer 2, early onset                                           | 1.17 | $1.61 \times 10^{-2}$ | 1.02  | $6.07 \times 10^{-1}$ |
| <i>NBN</i>     | Nibrin                                                                 | 1.16 | $2.26 \times 10^{-1}$ | 1.10  | $3.12 \times 10^{-1}$ |
| <i>RAD50</i>   | RAD50 homolog ( <i>S. cerevisiae</i> )                                 | 1.15 | $3.50 \times 10^{-1}$ | -1.14 | $3.96 \times 10^{-1}$ |
| <i>LIMK1</i>   | LIM domain kinase 1                                                    | 1.15 | $1.34 \times 10^{-3}$ | 1.20  | $1.67 \times 10^{-3}$ |
| <i>MAPK14</i>  | Mitogen-activated protein kinase 14                                    | 1.14 | $2.18 \times 10^{-1}$ | 1.03  | $8.05 \times 10^{-1}$ |
| <i>TAOK1</i>   | TAO kinase 1                                                           | 1.13 | $3.32 \times 10^{-1}$ | -1.15 | $3.06 \times 10^{-1}$ |
| <i>CDK5</i>    | Cyclin-dependent kinase 5                                              | 1.12 | $6.26 \times 10^{-2}$ | 1.26  | $6.48 \times 10^{-4}$ |
| <i>TP53BP1</i> | Tumor protein p53 binding protein 1                                    | 1.12 | $8.23 \times 10^{-2}$ | 1.02  | $8.03 \times 10^{-1}$ |
| <i>POLE</i>    | Polymerase (DNA directed), epsilon                                     | 1.12 | $2.41 \times 10^{-2}$ | 1.05  | $3.21 \times 10^{-1}$ |
| <i>MRE11A</i>  | MRE11 meiotic recombination 11 homolog A ( <i>S. cerevisiae</i> )      | 1.10 | $4.23 \times 10^{-1}$ | 1.05  | $6.12 \times 10^{-1}$ |

|                 |                                                                |       |                       |       |                       |
|-----------------|----------------------------------------------------------------|-------|-----------------------|-------|-----------------------|
| <i>ETV6</i>     | ets variant 6                                                  | 1.10  | $3.89 \times 10^{-1}$ | 1.14  | $7.57 \times 10^{-2}$ |
| <i>E2F1</i>     | E2F transcription factor 1                                     | 1.08  | $7.91 \times 10^{-2}$ | 1.21  | $9.59 \times 10^{-3}$ |
| <i>HUS1</i>     | HUS1 checkpoint homolog ( <i>S. Pombe</i> )                    | 1.08  | $2.59 \times 10^{-1}$ | 1.03  | $7.19 \times 10^{-1}$ |
| <i>GADD45A</i>  | Growth arrest and DNA-damage-inducible, alpha                  | 1.07  | $5.45 \times 10^{-1}$ | -1.00 | $9.99 \times 10^{-1}$ |
| <i>CDC25B</i>   | Cell division cycle 25 homolog B ( <i>S. Pombe</i> )           | 1.07  | $3.34 \times 10^{-1}$ | 1.06  | $4.34 \times 10^{-1}$ |
| <i>MDC1</i>     | Mediator of DNA damage checkpoint 1                            | 1.06  | $4.24 \times 10^{-1}$ | 1.03  | $6.25 \times 10^{-1}$ |
| <i>TOP2B</i>    | topoisomerase (DNA) II beta 180 kDa                            | 1.06  | $6.39 \times 10^{-1}$ | -1.29 | $3.22 \times 10^{-2}$ |
| <i>UBA3</i>     | Ubiquitin-like modifier activating enzyme 3                    | 1.05  | $5.31 \times 10^{-1}$ | 1.02  | $7.93 \times 10^{-1}$ |
| <i>TP73</i>     | Tumor protein p73                                              | 1.05  | $2.53 \times 10^{-1}$ | 1.06  | $1.64 \times 10^{-1}$ |
| <i>CDK2</i>     | Cyclin-dependent kinase 2                                      | 1.05  | $5.94 \times 10^{-1}$ | -1.09 | $2.64 \times 10^{-1}$ |
| <i>DCLRE1C</i>  | DNA cross-link repair 1C (PSO2 homolog, <i>S. cerevisiae</i> ) | 1.05  | $4.68 \times 10^{-1}$ | 1.20  | $1.05 \times 10^{-3}$ |
| <i>H2AFX</i>    | H2A histone family, member X                                   | 1.04  | $4.13 \times 10^{-1}$ | 1.25  | $4.58 \times 10^{-6}$ |
| <i>ATM</i>      | ataxia telangiectasia mutated                                  | 1.04  | $7.26 \times 10^{-1}$ | -1.21 | $7.93 \times 10^{-2}$ |
| <i>RAD17</i>    | RAD17 homolog ( <i>S. Pombe</i> )                              | 1.04  | $6.98 \times 10^{-1}$ | 1.21  | $1.44 \times 10^{-2}$ |
| <i>TRAF2</i>    | TNF receptor-associated factor 2                               | 1.02  | $6.59 \times 10^{-1}$ | 1.06  | $1.34 \times 10^{-1}$ |
| <i>UIMC1</i>    | Ubiquitin interaction motif containing 1                       | 1.02  | $7.46 \times 10^{-1}$ | 1.09  | $1.30 \times 10^{-1}$ |
| <i>MAPKAPK2</i> | Mitogen-activated protein kinase-activated protein kinase 2    | 1.01  | $7.91 \times 10^{-1}$ | 1.02  | $7.06 \times 10^{-1}$ |
| <i>CDC25C</i>   | Cell division cycle 25 homolog C ( <i>S. Pombe</i> )           | 1.01  | $8.74 \times 10^{-1}$ | 1.08  | $1.72 \times 10^{-1}$ |
| <i>TERF1</i>    | Telomeric repeat binding factor (NIMA-interacting) 1           | 1.01  | $9.26 \times 10^{-1}$ | -1.02 | $8.44 \times 10^{-1}$ |
| <i>HDAC4</i>    | Histone deacetylase 4                                          | 1.01  | $8.64 \times 10^{-1}$ | 1.02  | $5.65 \times 10^{-1}$ |
| <i>MAP2K2</i>   | Mitogen-activated protein kinase kinase 2                      | 1.00  | $9.69 \times 10^{-1}$ | 1.19  | $8.11 \times 10^{-3}$ |
| <i>SPDYA</i>    | Speedy homolog A ( <i>Xenopus</i> )                            | -1.01 | $8.79 \times 10^{-1}$ | 1.09  | $9.73 \times 10^{-2}$ |

|                |                                                                                       |       |                       |       |                       |
|----------------|---------------------------------------------------------------------------------------|-------|-----------------------|-------|-----------------------|
|                | laevis)                                                                               |       |                       |       |                       |
| <i>CEP164</i>  | Centrosomal protein 164 kDa                                                           | -1.01 | $8.19 \times 10^{-1}$ | 1.00  | $9.67 \times 10^{-1}$ |
| <i>CDKN1B</i>  | Cyclin-dependent kinase inhibitor 1B (p27, Kip1)                                      | -1.01 | $9.27 \times 10^{-1}$ | -1.09 | $3.39 \times 10^{-1}$ |
| <i>PPP5C</i>   | Protein phosphatase 5, catalytic subunit                                              | -1.01 | $8.02 \times 10^{-1}$ | 1.05  | $2.05 \times 10^{-1}$ |
| <i>CDKN2B</i>  | Cyclin-dependent kinase inhibitor 2B (p15, inhibits CDK4)                             | -1.01 | $8.38 \times 10^{-1}$ | 1.20  | $3.78 \times 10^{-3}$ |
| <i>FAM175A</i> | Family with sequence similarity 175, member A                                         | -1.02 | $7.51 \times 10^{-1}$ | -1.02 | $7.81 \times 10^{-1}$ |
| <i>RAD9A</i>   | RAD9 homolog A ( <i>S. Pombe</i> )                                                    | -1.03 | $5.52 \times 10^{-1}$ | 1.06  | $2.13 \times 10^{-1}$ |
| <i>CDT1</i>    | Chromatin licensing and DNA replication factor 1                                      | -1.03 | $6.54 \times 10^{-1}$ | 1.18  | $1.91 \times 10^{-2}$ |
| <i>HMGN1</i>   | High-mobility group nucleosome binding domain 1                                       | -1.04 | $3.83 \times 10^{-1}$ | 1.18  | $5.14 \times 10^{-3}$ |
| <i>PPP2CB</i>  | Protein phosphatase 2 (formerly 2A), catalytic subunit, beta isoform                  | -1.06 | $6.49 \times 10^{-1}$ | -1.30 | $2.75 \times 10^{-2}$ |
| <i>MCPH1</i>   | Microcephalin 1                                                                       | -1.07 | $2.65 \times 10^{-1}$ | -1.00 | $9.96 \times 10^{-1}$ |
| <i>MAPK1</i>   | Mitogen-activated protein kinase 1                                                    | -1.08 | $4.32 \times 10^{-1}$ | -1.26 | $1.93 \times 10^{-2}$ |
| <i>BTG3</i>    | BTG family, member 3                                                                  | -1.09 | $4.16 \times 10^{-1}$ | -1.07 | $4.18 \times 10^{-1}$ |
| <i>MLH1</i>    | mutL homolog 1, colon cancer, nonpolyposis type 2 ( <i>E. Coli</i> )                  | -1.12 | $1.27 \times 10^{-1}$ | -1.23 | $2.00 \times 10^{-3}$ |
| <i>CCNG1</i>   | Cyclin G1                                                                             | -1.14 | $2.93 \times 10^{-1}$ | -1.01 | $9.02 \times 10^{-1}$ |
| <i>CDKN1A</i>  | Cyclin-dependent kinase inhibitor 1A (p21, Cip1)                                      | -1.16 | $1.18 \times 10^{-1}$ | 1.01  | $9.32 \times 10^{-1}$ |
| <i>PPM1D</i>   | Protein phosphatase 1D magnesium-dependent, delta isoform                             | -1.20 | $9.29 \times 10^{-3}$ | -1.04 | $3.42 \times 10^{-1}$ |
| <i>WEE1</i>    | WEE1 homolog ( <i>S. Pombe</i> )                                                      | -1.21 | $3.05 \times 10^{-1}$ | -1.25 | $2.52 \times 10^{-1}$ |
| <i>FANCC</i>   | Fanconi anemia, complementation group C                                               | -1.21 | $3.49 \times 10^{-3}$ | -1.14 | $2.08 \times 10^{-2}$ |
| <i>MAPK3</i>   | Mitogen-activated protein kinase 3                                                    | -1.23 | $1.58 \times 10^{-4}$ | -1.08 | $2.10 \times 10^{-1}$ |
| <i>PTGS2</i>   | Prostaglandin-endoperoxide synthase 2 (prostaglandin G/H synthase and cyclooxygenase) | -1.72 | $1.98 \times 10^{-2}$ | -1.39 | $5.63 \times 10^{-2}$ |

|              |                                      |       |                        |       |                        |
|--------------|--------------------------------------|-------|------------------------|-------|------------------------|
| <i>KLF4</i>  | Kruppel-like factor 4 (gut)          | -2.31 | $1.83 \times 10^{-9}$  | -2.54 | $5.38 \times 10^{-11}$ |
| <i>CAV1</i>  | Caveolin 1, caveolae protein, 22 kDa | -4.24 | $2.78 \times 10^{-10}$ | -4.80 | $3.59 \times 10^{-12}$ |
| <i>ATRIP</i> | ATR interacting protein              |       |                        |       |                        |

**Table S3.** Differential changes in apoptosis genes

| Name          | Description                                               | SCC         |                       | ADC         |                       |
|---------------|-----------------------------------------------------------|-------------|-----------------------|-------------|-----------------------|
|               |                                                           | fold-change | p-value               | fold-change | p-value               |
| <i>Bim</i>    | BCL2-like 11 (apoptosis facilitator)                      | 1.56        | $6.19 \times 10^{-6}$ | 1.04        | $4.42 \times 10^{-1}$ |
| CYCS          | Cytochrome c, somatic                                     | 1.49        | $1.46 \times 10^{-3}$ | 1.10        | $4.69 \times 10^{-1}$ |
| <i>ATR</i>    | Ataxia telangiectasia and Rad3 related                    | 1.46        | $1.50 \times 10^{-4}$ | 1.10        | $2.66 \times 10^{-1}$ |
| <i>CAPN1</i>  | Calpain 1, (mu/I) large subunit                           | 1.42        | $1.09 \times 10^{-7}$ | 1.21        | $1.46 \times 10^{-3}$ |
| <i>BIK</i>    | BCL2-interacting killer (apoptosis-inducing)              | 1.38        | $4.47 \times 10^{-6}$ | 1.21        | $1.73 \times 10^{-3}$ |
| <i>CASP3</i>  | Caspase 3, apoptosis-related cysteine peptidase           | 1.37        | $1.95 \times 10^{-4}$ | 1.08        | $2.50 \times 10^{-1}$ |
| <i>BIRC5</i>  | Baculoviral IAP repeat-containing 5                       | 1.35        | $1.93 \times 10^{-7}$ | 1.26        | $1.52 \times 10^{-4}$ |
| <i>BAG1</i>   | BCL2-associated athanogene                                | 1.23        | $1.19 \times 10^{-1}$ | -1.08       | $4.39 \times 10^{-1}$ |
| <i>BIRC4</i>  | X-linked inhibitor of apoptosis                           | 1.22        | $1.26 \times 10^{-2}$ | -1.01       | $9.11 \times 10^{-1}$ |
| <i>TP53</i>   | Tumor protein p53                                         | 1.18        | $6.27 \times 10^{-2}$ | 1.09        | $1.88 \times 10^{-1}$ |
| <i>DFFA</i>   | DNA fragmentation factor, 45 kDa, alpha polypeptide       | 1.18        | $2.40 \times 10^{-2}$ | 1.09        | $1.07 \times 10^{-1}$ |
| <i>AIFM1</i>  | Apoptosis-inducing factor, mitochondrion-associated, 1    | 1.15        | $5.22 \times 10^{-2}$ | 1.09        | $1.77 \times 10^{-1}$ |
| <i>BAK1</i>   | BCL2-antagonist/killer 1                                  | 1.13        | $1.08 \times 10^{-1}$ | 1.06        | $6.30 \times 10^{-1}$ |
| <i>ENDO G</i> | Endonuclease G                                            | 1.12        | $5.69 \times 10^{-3}$ | 1.11        | $6.11 \times 10^{-2}$ |
| <i>BAX</i>    | BCL2-associated X protein                                 | 1.10        | $5.67 \times 10^{-2}$ | 1.21        | $4.78 \times 10^{-4}$ |
| <i>GZMK</i>   | Granzyme K (granzyme 3; tryptase II)                      | 1.08        | $5.59 \times 10^{-1}$ | -1.17       | $2.67 \times 10^{-1}$ |
| <i>DIABLO</i> | Diablo homolog ( <i>Drosophila</i> )                      | 1.08        | $2.01 \times 10^{-1}$ | 1.09        | $1.01 \times 10^{-1}$ |
| <i>CASP6</i>  | Caspase 6, apoptosis-related cysteine peptidase           | 1.07        | $4.09 \times 10^{-1}$ | 1.16        | $7.90 \times 10^{-2}$ |
| <i>MDM2</i>   | Mdm2 p53 binding protein homolog (mouse)                  | 1.05        | $5.56 \times 10^{-1}$ | -1.04       | $8.03 \times 10^{-1}$ |
| <i>GZMB</i>   | Granzyme B (granzyme 2, cytotoxic T-lymphocyte-associated | 1.05        | $6.19 \times 10^{-1}$ | -1.18       | $1.08 \times 10^{-3}$ |

|                |                                                                              |       |                       |       |                       |
|----------------|------------------------------------------------------------------------------|-------|-----------------------|-------|-----------------------|
|                | serine esterase 1)                                                           |       |                       |       |                       |
| <i>ATM</i>     | Ataxia telangiectasia mutated                                                | 1.04  | $7.26 \times 10^{-1}$ | -1.21 | $7.93 \times 10^{-2}$ |
| <i>AKT1</i>    | v-akt murine thymoma viral oncogene homolog 1                                | 1.03  | $6.06 \times 10^{-1}$ | 1.14  | $1.98 \times 10^{-2}$ |
| <i>BOK</i>     | BCL2-related ovarian killer                                                  | 1.01  | $8.26 \times 10^{-1}$ | 1.11  | $6.98 \times 10^{-2}$ |
| <i>BID</i>     | BH3 interacting domain death agonist                                         | 1.01  | $8.65 \times 10^{-1}$ | 1.05  | $2.70 \times 10^{-1}$ |
| <i>BCL2L2</i>  | BCL2-like 2                                                                  | 1.01  | $9.44 \times 10^{-1}$ | -1.12 | $1.09 \times 10^{-1}$ |
| <i>BMF</i>     | Bcl2 modifying factor                                                        | -1.00 | $9.97 \times 10^{-1}$ | 1.12  | $3.21 \times 10^{-2}$ |
| <i>BCL2L1</i>  | BCL2-like 1                                                                  | -1.01 | $8.91 \times 10^{-1}$ | -1.02 | $8.72 \times 10^{-1}$ |
| <i>BCL2</i>    | B-cell CLL/lymphoma 2                                                        | -1.04 | $4.97 \times 10^{-1}$ | 1.08  | $8.44 \times 10^{-2}$ |
| <i>CASP7</i>   | Caspase 7, apoptosis-related cysteine peptidase                              | -1.04 | $4.80 \times 10^{-1}$ | 1.02  | $7.05 \times 10^{-1}$ |
| <i>BBC3</i>    | BCL2 binding component 3                                                     | -1.05 | $3.36 \times 10^{-1}$ | 1.12  | $8.96 \times 10^{-3}$ |
| <i>DFFB</i>    | DNA fragmentation factor, 40 kDa, beta polypeptide (caspase-activated DNase) | -1.05 | $2.89 \times 10^{-1}$ | 1.03  | $6.72 \times 10^{-1}$ |
| <i>APAF1</i>   | Apoptotic peptidase activating factor 1                                      | -1.05 | $2.49 \times 10^{-1}$ | -1.04 | $3.48 \times 10^{-1}$ |
| <i>BCL2L10</i> | BCL2-like 10 (apoptosis facilitator)                                         | -1.06 | $2.93 \times 10^{-1}$ | 1.10  | $1.04 \times 10^{-1}$ |
| <i>CASP9</i>   | Caspase 9, apoptosis-related cysteine peptidase                              | -1.08 | $1.61 \times 10^{-1}$ | 1.04  | $4.76 \times 10^{-1}$ |
| <i>BIRC2</i>   | Baculoviral IAP repeat-containing 2                                          | -1.11 | $1.48 \times 10^{-1}$ | -1.30 | $6.32 \times 10^{-3}$ |
| <i>CASP10</i>  | Caspase 10, apoptosis-related cysteine peptidase                             | -1.12 | $1.46 \times 10^{-1}$ | 1.01  | $8.79 \times 10^{-1}$ |
| <i>BCL2A1</i>  | BCL2-related protein A1                                                      | -1.12 | $3.60 \times 10^{-1}$ | -1.20 | $5.64 \times 10^{-2}$ |
| <i>CASP4</i>   | Caspase 4, apoptosis-related cysteine peptidase                              | -1.13 | $2.69 \times 10^{-1}$ | -1.13 | $2.76 \times 10^{-1}$ |
| <i>BAD</i>     | BCL2-associated agonist of cell death                                        | -1.14 | $2.46 \times 10^{-2}$ | 1.06  | $1.96 \times 10^{-1}$ |
| <i>CASP8</i>   | Caspase 8, apoptosis-related cysteine peptidase                              | -1.16 | $3.38 \times 10^{-2}$ | -1.20 | $1.48 \times 10^{-2}$ |



|              |                                                 |       |                        |       |                       |
|--------------|-------------------------------------------------|-------|------------------------|-------|-----------------------|
| <i>NAIP</i>  | NLR family, apoptosis inhibitory protein        | -1.23 | $2.90 \times 10^{-2}$  | -1.17 | $6.10 \times 10^{-2}$ |
| <i>BIRC3</i> | Baculoviral IAP repeat-containing 3             | -1.27 | $1.25 \times 10^{-1}$  | 1.04  | $7.99 \times 10^{-1}$ |
| <i>CAPN2</i> | Calpain 2, (m/II) large subunit                 | -1.41 | $2.71 \times 10^{-4}$  | -1.22 | $1.81 \times 10^{-1}$ |
| <i>MCL1</i>  | Myeloid cell leukemia sequence 1 (BCL2-related) | -1.81 | $6.44 \times 10^{-8}$  | -1.59 | $8.64 \times 10^{-5}$ |
| <i>CFLAR</i> | CASP8 and FADD-like apoptosis regulator         | -2.34 | $2.59 \times 10^{-10}$ | -1.80 | $1.80 \times 10^{-4}$ |

**Table S4.** Differential changes in oncogenes

| Name            | Description                                                                           | SCC         |                       | ADC         |                       |
|-----------------|---------------------------------------------------------------------------------------|-------------|-----------------------|-------------|-----------------------|
|                 |                                                                                       | fold-change | p-value               | fold-change | p-value               |
| <i>ECT2</i>     | Epithelial cell transforming sequence 2 oncogene                                      | 3.59        | $2.55 \times 10^{-8}$ | 1.54        | $4.55 \times 10^{-3}$ |
| <i>DCUN1D1</i>  | DCN1, defective in cullin neddylation 1, domain containing 1 ( <i>S. cerevisiae</i> ) | 2.66        | $4.00 \times 10^{-7}$ | -1.06       | $4.63 \times 10^{-1}$ |
| <i>RAB10</i>    | RAB10, member RAS oncogene family                                                     | 1.84        | $2.24 \times 10^{-5}$ | 1.13        | $4.28 \times 10^{-1}$ |
| <i>RAB25</i>    | RAB25, member RAS oncogene family                                                     | 1.65        | $2.09 \times 10^{-4}$ | 1.78        | $1.55 \times 10^{-7}$ |
| <i>MET</i>      | met proto-oncogene (hepatocyte growth factor receptor)                                | 1.60        | $8.63 \times 10^{-3}$ | 1.51        | $3.08 \times 10^{-2}$ |
| <i>NAE1</i>     | NEDD8 activating enzyme E1 subunit 1                                                  | 1.59        | $1.64 \times 10^{-3}$ | 1.10        | $3.85 \times 10^{-1}$ |
| <i>RAP2B</i>    | RAP2B, member of RAS oncogene family                                                  | 1.56        | $9.39 \times 10^{-5}$ | 1.14        | $1.07 \times 10^{-2}$ |
| <i>MCM3</i>     | Minichromosome maintenance complex component 3                                        | 1.56        | $4.24 \times 10^{-5}$ | 1.20        | $3.48 \times 10^{-2}$ |
| <i>SLC4A1AP</i> | Solute carrier family 4 (anion exchanger), member 1, adaptor protein                  | 1.52        | $4.59 \times 10^{-3}$ | 1.05        | $7.03 \times 10^{-1}$ |
| <i>DEK</i>      | DEK oncogene                                                                          | 1.50        | $2.98 \times 10^{-3}$ | -1.04       | $7.59 \times 10^{-1}$ |
| <i>RAB38</i>    | RAB38, member RAS oncogene family                                                     | 1.49        | $4.24 \times 10^{-4}$ | 1.16        | $3.15 \times 10^{-2}$ |
| <i>HRASLS</i>   | HRAS-like suppressor                                                                  | 1.48        | $3.54 \times 10^{-5}$ | 1.36        | $1.94 \times 10^{-4}$ |
| <i>SET</i>      | SET nuclear oncogene                                                                  | 1.45        | $3.91 \times 10^{-5}$ | 1.06        | $5.01 \times 10^{-1}$ |
| <i>KRAS</i>     | v-Ki-ras2 Kirsten rat sarcoma viral oncogene homolog                                  | 1.45        | $1.11 \times 10^{-3}$ | 1.01        | $9.30 \times 10^{-1}$ |
| <i>NET1</i>     | Neuroepithelial cell transforming 1                                                   | 1.42        | $2.25 \times 10^{-4}$ | 1.38        | $4.58 \times 10^{-5}$ |
| <i>P4HB</i>     | Prolyl 4-hydroxylase, beta polypeptide                                                | 1.42        | $5.22 \times 10^{-5}$ | 1.45        | $1.69 \times 10^{-3}$ |
| <i>EIF3E</i>    | Eukaryotic translation initiation factor 3, subunit E                                 | 1.41        | $6.90 \times 10^{-3}$ | 1.13        | $3.06 \times 10^{-1}$ |

|                |                                                                           |      |                       |       |                       |
|----------------|---------------------------------------------------------------------------|------|-----------------------|-------|-----------------------|
| <i>PARK7</i>   | Parkinson disease (autosomal recessive, early onset) 7                    | 1.40 | $4.04 \times 10^{-4}$ | 1.31  | $9.36 \times 10^{-3}$ |
| <i>TFG</i>     | TRK-fused gene                                                            | 1.39 | $1.12 \times 10^{-2}$ | 1.21  | $3.35 \times 10^{-2}$ |
| <i>MYBL2</i>   | v-myb myeloblastosis viral oncogene homolog (avian)-like 2                | 1.38 | $4.82 \times 10^{-7}$ | 1.21  | $2.09 \times 10^{-3}$ |
| <i>MYC</i>     | v-myc myelocytomatosis viral oncogene homolog (avian)                     | 1.36 | $5.01 \times 10^{-2}$ | -1.21 | $4.14 \times 10^{-2}$ |
| <i>CRKL</i>    | v-crk sarcoma virus CT10 oncogene homolog (avian)-like                    | 1.36 | $8.49 \times 10^{-6}$ | 1.10  | $1.41 \times 10^{-1}$ |
| <i>CTTN</i>    | Cortactin                                                                 | 1.35 | $1.90 \times 10^{-2}$ | 1.22  | $8.26 \times 10^{-2}$ |
| <i>GNB2L1</i>  | Guanine nucleotide binding protein (G protein), beta polypeptide 2-like 1 | 1.32 | $6.89 \times 10^{-3}$ | 1.04  | $7.48 \times 10^{-1}$ |
| <i>LCN2</i>    | Lipocalin 2                                                               | 1.31 | $2.80 \times 10^{-2}$ | -1.00 | $9.66 \times 10^{-1}$ |
| <i>RAN</i>     | RAN, member RAS oncogene family                                           | 1.31 | $3.58 \times 10^{-6}$ | 1.28  | $3.71 \times 10^{-6}$ |
| <i>RAB18</i>   | RAB18, member RAS oncogene family                                         | 1.30 | $8.31 \times 10^{-2}$ | -1.13 | $3.36 \times 10^{-1}$ |
| <i>BMI1</i>    | BMI1 polycomb ring finger oncogene                                        | 1.29 | $1.26 \times 10^{-2}$ | 1.03  | $8.21 \times 10^{-1}$ |
| <i>RAB30</i>   | RAB30, member RAS oncogene family                                         | 1.28 | $8.22 \times 10^{-3}$ | 1.12  | $1.69 \times 10^{-1}$ |
| <i>RAB11A</i>  | RAB11A, member RAS oncogene family                                        | 1.28 | $8.28 \times 10^{-2}$ | -1.41 | $7.79 \times 10^{-3}$ |
| <i>RAB13</i>   | RAB13, member RAS oncogene family                                         | 1.26 | $3.18 \times 10^{-2}$ | 1.19  | $2.55 \times 10^{-1}$ |
| <i>RAB6B</i>   | RAB6B, member RAS oncogene family                                         | 1.26 | $5.74 \times 10^{-3}$ | 1.11  | $1.84 \times 10^{-3}$ |
| <i>YES1</i>    | v-yes-1 Yamaguchi sarcoma viral oncogene homolog 1                        | 1.25 | $3.59 \times 10^{-2}$ | -1.04 | $6.83 \times 10^{-1}$ |
| <i>PIM2</i>    | pim-2 oncogene                                                            | 1.24 | $5.84 \times 10^{-3}$ | 1.23  | $1.27 \times 10^{-3}$ |
| <i>ARHGEF5</i> | Rho guanine nucleotide exchange factor (GEF) 5                            | 1.24 | $1.80 \times 10^{-2}$ | 1.05  | $4.13 \times 10^{-1}$ |
| <i>MYB</i>     | v-myb myeloblastosis viral oncogene homolog (avian)                       | 1.24 | $4.77 \times 10^{-2}$ | -1.01 | $9.21 \times 10^{-1}$ |
| <i>HRAS</i>    | v-Ha-ras Harvey rat sarcoma viral oncogene homolog                        | 1.23 | $1.95 \times 10^{-5}$ | 1.19  | $6.43 \times 10^{-5}$ |

|                  |                                                                                                    |      |                       |       |                       |
|------------------|----------------------------------------------------------------------------------------------------|------|-----------------------|-------|-----------------------|
| <i>RAB15</i>     | RAB15, member RAS oncogene family                                                                  | 1.23 | $4.39 \times 10^{-3}$ | 1.13  | $4.13 \times 10^{-2}$ |
| <i>EGFR</i>      | Epidermal growth factor receptor (erythroblastic leukemia viral (v-erb-b) oncogene homolog, avian) | 1.22 | $1.90 \times 10^{-2}$ | 1.30  | $1.06 \times 10^{-1}$ |
| <i>RAB22A</i>    | RAB22A, member RAS oncogene family                                                                 | 1.21 | $8.18 \times 10^{-3}$ | 1.17  | $4.41 \times 10^{-2}$ |
| <i>TPR</i>       | Translocated promoter region (to activated MET oncogene)                                           | 1.19 | $1.23 \times 10^{-1}$ | -1.04 | $7.82 \times 10^{-1}$ |
| <i>NRAS</i>      | Neuroblastoma RAS viral (v-ras) oncogene homolog                                                   | 1.19 | $4.03 \times 10^{-2}$ | 1.11  | $1.30 \times 10^{-1}$ |
| <i>RAB9A</i>     | RAB9A, member RAS oncogene family                                                                  | 1.18 | $7.47 \times 10^{-2}$ | 1.03  | $7.55 \times 10^{-1}$ |
| <i>FGFR1OP</i>   | FGFR1 oncogene partner                                                                             | 1.18 | $2.39 \times 10^{-3}$ | 1.01  | $8.26 \times 10^{-1}$ |
| <i>NUP214</i>    | Nucleoporin 214 kDa                                                                                | 1.18 | $3.40 \times 10^{-2}$ | -1.19 | $2.16 \times 10^{-2}$ |
| <i>RALA</i>      | v-ral simian leukemia viral oncogene homolog A (ras related)                                       | 1.17 | $5.29 \times 10^{-2}$ | 1.02  | $8.17 \times 10^{-1}$ |
| <i>FGFR1OP 2</i> | FGFR1 oncogene partner 2                                                                           | 1.17 | $1.84 \times 10^{-1}$ | 1.04  | $7.76 \times 10^{-1}$ |
| <i>EWSR1</i>     | Ewing sarcoma breakpoint region 1                                                                  | 1.17 | $4.91 \times 10^{-2}$ | -1.09 | $2.18 \times 10^{-1}$ |
| <i>RAB1A</i>     | RAB1A, member RAS oncogene family                                                                  | 1.17 | $2.81 \times 10^{-1}$ | 1.07  | $6.85 \times 10^{-1}$ |
| <i>MAFB</i>      | v-maf musculoaponeurotic fibrosarcoma oncogene homolog B (avian)                                   | 1.16 | $9.99 \times 10^{-2}$ | 1.04  | $5.73 \times 10^{-1}$ |
| <i>RUNX1</i>     | runt-related transcription factor 1                                                                | 1.16 | $3.46 \times 10^{-2}$ | 1.23  | $3.37 \times 10^{-4}$ |
| <i>RAB2A</i>     | RAB2A, member RAS oncogene family                                                                  | 1.16 | $1.31 \times 10^{-1}$ | 1.13  | $2.68 \times 10^{-1}$ |
| <i>FUS</i>       | Fusion (involved in t(12;16) in malignant liposarcoma)                                             | 1.16 | $1.21 \times 10^{-1}$ | -1.02 | $8.58 \times 10^{-1}$ |
| <i>RAB3B</i>     | RAB3B, member RAS oncogene family                                                                  | 1.15 | $9.92 \times 10^{-2}$ | 1.19  | $3.84 \times 10^{-2}$ |
| <i>AKT2</i>      | v-akt murine thymoma viral oncogene homolog 2                                                      | 1.14 | $9.05 \times 10^{-3}$ | 1.01  | $8.07 \times 10^{-1}$ |
| <i>RAB27B</i>    | RAB27B, member RAS oncogene family                                                                 | 1.14 | $1.22 \times 10^{-1}$ | 1.10  | $2.80 \times 10^{-1}$ |

|                |                                                                                 |      |                       |       |                       |
|----------------|---------------------------------------------------------------------------------|------|-----------------------|-------|-----------------------|
| <i>HKR1</i>    | GLI-Kruppel family member HKR1                                                  | 1.14 | $5.99 \times 10^{-2}$ | 1.11  | $1.08 \times 10^{-2}$ |
| <i>ITPA</i>    | Inosine triphosphatase (nucleoside triphosphate pyrophosphatase)                | 1.13 | $2.09 \times 10^{-2}$ | 1.09  | $6.25 \times 10^{-2}$ |
| <i>MYCL1</i>   | v-myc myelocytomatosis viral oncogene homolog 1, lung carcinoma derived (avian) | 1.13 | $1.19 \times 10^{-2}$ | 1.18  | $1.35 \times 10^{-2}$ |
| <i>MERTK</i>   | c-mer proto-oncogene tyrosine kinase                                            | 1.13 | $2.82 \times 10^{-1}$ | 1.03  | $7.69 \times 10^{-1}$ |
| <i>BRI3BP</i>  | BRI3 binding protein                                                            | 1.13 | $5.26 \times 10^{-2}$ | 1.23  | $4.03 \times 10^{-4}$ |
| <i>ENTPD5</i>  | ectonucleoside triphosphate diphosphohydrolase 5                                | 1.13 | $1.89 \times 10^{-1}$ | 1.11  | $1.60 \times 10^{-1}$ |
| <i>RAB1B</i>   | RAB1B, member RAS oncogene family                                               | 1.12 | $2.26 \times 10^{-1}$ | 1.07  | $5.58 \times 10^{-1}$ |
| <i>SKIL</i>    | SKI-like oncogene                                                               | 1.12 | $3.14 \times 10^{-1}$ | -1.05 | $6.63 \times 10^{-1}$ |
| <i>RAB7A</i>   | RAB7A, member RAS oncogene family                                               | 1.12 | $2.95 \times 10^{-1}$ | -1.27 | $1.11 \times 10^{-1}$ |
| <i>RAB40C</i>  | RAB40C, member RAS oncogene family                                              | 1.11 | $8.23 \times 10^{-2}$ | 1.32  | $1.24 \times 10^{-4}$ |
| <i>RAB12</i>   | RAB12, member RAS oncogene family                                               | 1.11 | $4.32 \times 10^{-2}$ | -1.03 | $5.35 \times 10^{-1}$ |
| <i>IRF4</i>    | Interferon regulatory factor 4                                                  | 1.11 | $1.93 \times 10^{-1}$ | 1.10  | $2.44 \times 10^{-2}$ |
| <i>ELK1</i>    | ELK1, member of ETS oncogene family                                             | 1.10 | $4.22 \times 10^{-2}$ | 1.15  | $6.63 \times 10^{-3}$ |
| <i>ETV6</i>    | ets variant 6                                                                   | 1.10 | $3.89 \times 10^{-1}$ | 1.14  | $7.57 \times 10^{-2}$ |
| <i>RAB40B</i>  | RAB40B, member RAS oncogene family                                              | 1.10 | $5.42 \times 10^{-2}$ | 1.15  | $1.38 \times 10^{-3}$ |
| <i>TET1</i>    | tet oncogene 1                                                                  | 1.10 | $2.30 \times 10^{-1}$ | 1.03  | $5.79 \times 10^{-1}$ |
| <i>RAB8A</i>   | RAB8A, member RAS oncogene family                                               | 1.08 | $4.70 \times 10^{-1}$ | -1.26 | $1.09 \times 10^{-1}$ |
| <i>RABL4</i>   | RAB, member of RAS oncogene family-like 4                                       | 1.08 | $2.30 \times 10^{-1}$ | 1.12  | $8.22 \times 10^{-2}$ |
| <i>BLOC1S2</i> | Biogenesis of lysosomal organelles complex-1, subunit 2                         | 1.08 | $3.59 \times 10^{-1}$ | 1.01  | $8.43 \times 10^{-1}$ |
| <i>RAB3D</i>   | RAB3D, member RAS oncogene family                                               | 1.08 | $1.95 \times 10^{-1}$ | 1.08  | $2.11 \times 10^{-1}$ |

|                |                                                                                                     |      |                       |       |                       |
|----------------|-----------------------------------------------------------------------------------------------------|------|-----------------------|-------|-----------------------|
| <i>VAV2</i>    | vav 2 guanine nucleotide exchange factor                                                            | 1.08 | $3.26 \times 10^{-1}$ | 1.01  | $8.41 \times 10^{-1}$ |
| <i>RAB7L1</i>  | RAB7, member RAS oncogene family-like 1                                                             | 1.07 | $1.27 \times 10^{-1}$ | -1.08 | $1.81 \times 10^{-1}$ |
| <i>MRPS11</i>  | Mitochondrial ribosomal protein S11                                                                 | 1.07 | $1.84 \times 10^{-1}$ | 1.17  | $5.48 \times 10^{-3}$ |
| <i>CBL</i>     | Cas-Br-M (murine) ecotropic retroviral transforming sequence                                        | 1.07 | $1.83 \times 10^{-1}$ | -1.03 | $5.84 \times 10^{-1}$ |
| <i>RAP2C</i>   | RAP2C, member of RAS oncogene family                                                                | 1.07 | $2.09 \times 10^{-1}$ | 1.15  | $8.69 \times 10^{-4}$ |
| <i>RAB6A</i>   | RAB6A, member RAS oncogene family                                                                   | 1.07 | $4.65 \times 10^{-1}$ | 1.01  | $8.62 \times 10^{-1}$ |
| <i>RAB23</i>   | RAB23, member RAS oncogene family                                                                   | 1.07 | $5.96 \times 10^{-1}$ | -1.32 | $2.63 \times 10^{-2}$ |
| <i>RAB3A</i>   | RAB3A, member RAS oncogene family                                                                   | 1.06 | $1.36 \times 10^{-1}$ | 1.10  | $7.76 \times 10^{-2}$ |
| <i>RAB21</i>   | RAB21, member RAS oncogene family                                                                   | 1.06 | $6.12 \times 10^{-1}$ | -1.23 | $1.99 \times 10^{-1}$ |
| <i>TMEM50A</i> | Transmembrane protein 50A                                                                           | 1.06 | $6.51 \times 10^{-1}$ | -1.06 | $5.98 \times 10^{-1}$ |
| <i>RELB</i>    | v-rel reticuloendotheliosis viral oncogene homolog B                                                | 1.05 | $3.13 \times 10^{-1}$ | 1.12  | $6.33 \times 10^{-2}$ |
| <i>RAB26</i>   | RAB26, member RAS oncogene family                                                                   | 1.05 | $3.25 \times 10^{-1}$ | 1.21  | $1.53 \times 10^{-3}$ |
| <i>GLI3</i>    | GLI family zinc finger 3                                                                            | 1.05 | $5.64 \times 10^{-1}$ | -1.03 | $6.47 \times 10^{-1}$ |
| <i>GLI4</i>    | GLI family zinc finger 4                                                                            | 1.04 | $4.00 \times 10^{-1}$ | 1.14  | $5.81 \times 10^{-4}$ |
| <i>RRAS2</i>   | Related RAS viral (r-ras) oncogene homolog 2                                                        | 1.04 | $4.13 \times 10^{-1}$ | 1.20  | $1.64 \times 10^{-4}$ |
| <i>NR2F6</i>   | Nuclear receptor subfamily 2, group F, member 6                                                     | 1.04 | $4.42 \times 10^{-1}$ | 1.23  | $4.71 \times 10^{-5}$ |
| <i>FGF3</i>    | Fibroblast growth factor 3 (murine mammary tumor virus integration site (v-int-2) oncogene homolog) | 1.04 | $4.62 \times 10^{-1}$ | 1.21  | $1.62 \times 10^{-2}$ |
| <i>PIM1</i>    | pim-1 oncogene                                                                                      | 1.04 | $6.53 \times 10^{-1}$ | 1.07  | $1.13 \times 10^{-1}$ |
| <i>ZSCAN22</i> | Zinc finger and SCAN domain containing 22                                                           | 1.03 | $5.80 \times 10^{-1}$ | 1.06  | $2.53 \times 10^{-1}$ |
| <i>DDX6</i>    | DEAD (Asp-Glu-Ala-Asp) box polypeptide 6                                                            | 1.03 | $8.35 \times 10^{-1}$ | -1.18 | $2.93 \times 10^{-1}$ |

|               |                                                                                   |      |                       |       |                       |
|---------------|-----------------------------------------------------------------------------------|------|-----------------------|-------|-----------------------|
| <i>RAB35</i>  | RAB35, member RAS oncogene family                                                 | 1.03 | $7.65 \times 10^{-1}$ | -1.09 | $3.27 \times 10^{-1}$ |
| <i>ELK4</i>   | ELK4, ETS-domain protein (SRF accessory protein 1)                                | 1.03 | $5.53 \times 10^{-1}$ | -1.09 | $8.34 \times 10^{-2}$ |
| <i>AKT1</i>   | v-akt murine thymoma viral oncogene homolog 1                                     | 1.03 | $6.06 \times 10^{-1}$ | 1.14  | $1.98 \times 10^{-2}$ |
| <i>RAB28</i>  | RAB28, member RAS oncogene family                                                 | 1.03 | $7.67 \times 10^{-1}$ | -1.13 | $3.06 \times 10^{-1}$ |
| <i>ERBB3</i>  | v-erb-b2 erythroblastic leukemia viral oncogene homolog 3 (avian)                 | 1.03 | $6.41 \times 10^{-1}$ | 1.22  | $2.29 \times 10^{-4}$ |
| <i>ARAF</i>   | v-raf murine sarcoma 3611 viral oncogene homolog                                  | 1.03 | $6.08 \times 10^{-1}$ | 1.10  | $2.20 \times 10^{-2}$ |
| <i>ETV7</i>   | ets variant 7                                                                     | 1.03 | $6.19 \times 10^{-1}$ | -1.01 | $8.07 \times 10^{-1}$ |
| <i>RAB34</i>  | RAB34, member RAS oncogene family                                                 | 1.03 | $5.98 \times 10^{-1}$ | 1.24  | $1.77 \times 10^{-6}$ |
| <i>MAFG</i>   | v-maf musculoaponeurotic fibrosarcoma oncogene homolog G (avian)                  | 1.02 | $5.43 \times 10^{-1}$ | 1.04  | $2.90 \times 10^{-1}$ |
| <i>RAB14</i>  | RAB14, member RAS oncogene family                                                 | 1.02 | $8.66 \times 10^{-1}$ | -1.57 | $3.44 \times 10^{-3}$ |
| <i>RAB3C</i>  | RAB3C, member RAS oncogene family                                                 | 1.02 | $7.84 \times 10^{-1}$ | -1.05 | $4.08 \times 10^{-1}$ |
| <i>MAF</i>    | v-maf musculoaponeurotic fibrosarcoma oncogene homolog (avian)                    | 1.02 | $7.34 \times 10^{-1}$ | -1.13 | $2.73 \times 10^{-3}$ |
| <i>RAB39B</i> | RAB39B, member RAS oncogene family                                                | 1.02 | $7.28 \times 10^{-1}$ | -1.02 | $7.92 \times 10^{-1}$ |
| <i>RET</i>    | ret proto-oncogene                                                                | 1.02 | $6.56 \times 10^{-1}$ | 1.01  | $8.71 \times 10^{-1}$ |
| <i>RALB</i>   | v-ral simian leukemia viral oncogene homolog B (ras related; GTP binding protein) | 1.02 | $8.65 \times 10^{-1}$ | -1.35 | $8.13 \times 10^{-3}$ |
| <i>SRC</i>    | v-src sarcoma (Schmidt-Ruppin A-2) viral oncogene homolog (avian)                 | 1.02 | $6.52 \times 10^{-1}$ | 1.10  | $2.50 \times 10^{-2}$ |
| <i>TTC23</i>  | Tetratricopeptide repeat domain 23                                                | 1.02 | $7.68 \times 10^{-1}$ | -1.03 | $4.95 \times 10^{-1}$ |
| <i>WNT3</i>   | Wingless-type MMTV integration site family, member 3                              | 1.02 | $7.43 \times 10^{-1}$ | 1.20  | $5.90 \times 10^{-4}$ |
| <i>GLI1</i>   | GLI family zinc finger 1                                                          | 1.02 | $7.63 \times 10^{-1}$ | 1.12  | $7.94 \times 10^{-2}$ |

|               |                                                                                    |       |                       |       |                       |
|---------------|------------------------------------------------------------------------------------|-------|-----------------------|-------|-----------------------|
| <i>GLI2</i>   | GLI family zinc finger 2                                                           | 1.02  | $7.61 \times 10^{-1}$ | 1.11  | $3.29 \times 10^{-2}$ |
| <i>MAFA</i>   | v-maf musculoaponeurotic fibrosarcoma oncogene homolog A (avian)                   | 1.01  | $8.88 \times 10^{-1}$ | 1.15  | $8.23 \times 10^{-3}$ |
| <i>RHOC</i>   | ras homolog gene family, member C                                                  | 1.01  | $9.24 \times 10^{-1}$ | 1.08  | $2.34 \times 10^{-1}$ |
| <i>RAB24</i>  | RAB24, member RAS oncogene family                                                  | 1.01  | $8.90 \times 10^{-1}$ | 1.06  | $1.48 \times 10^{-1}$ |
| <i>RAB33B</i> | RAB33B, member RAS oncogene family                                                 | 1.01  | $9.39 \times 10^{-1}$ | 1.11  | $1.03 \times 10^{-1}$ |
| <i>EPHA1</i>  | EPH receptor A1                                                                    | 1.00  | $8.99 \times 10^{-1}$ | 1.08  | $7.17 \times 10^{-2}$ |
| <i>RAB5B</i>  | RAB5B, member RAS oncogene family                                                  | 1.00  | $9.91 \times 10^{-1}$ | -1.11 | $3.12 \times 10^{-1}$ |
| <i>WNT1</i>   | Wingless-type MMTV integration site family, member 1                               | 1.00  | $9.91 \times 10^{-1}$ | 1.13  | $2.91 \times 10^{-2}$ |
| <i>CRK</i>    | v-crk sarcoma virus CT10 oncogene homolog (avian)                                  | -1.00 | $9.49 \times 10^{-1}$ | 1.06  | $3.64 \times 10^{-1}$ |
| <i>TCL1A</i>  | T-cell leukemia/lymphoma 1A                                                        | -1.00 | $9.51 \times 10^{-1}$ | 1.12  | $5.70 \times 10^{-2}$ |
| <i>RABL5</i>  | RAB, member RAS oncogene family-like 5                                             | -1.01 | $9.11 \times 10^{-1}$ | 1.05  | $3.03 \times 10^{-1}$ |
| <i>RAB33A</i> | RAB33A, member RAS oncogene family                                                 | -1.01 | $8.79 \times 10^{-1}$ | 1.08  | $2.20 \times 10^{-1}$ |
| <i>RAB5C</i>  | RAB5C, member RAS oncogene family                                                  | -1.01 | $9.07 \times 10^{-1}$ | 1.07  | $4.51 \times 10^{-1}$ |
| <i>MCF2</i>   | MCF.2 cell line derived transforming sequence                                      | -1.01 | $8.35 \times 10^{-1}$ | 1.13  | $2.25 \times 10^{-2}$ |
| <i>MYCN</i>   | v-myc myelocytomatosis viral related oncogene, neuroblastoma derived (avian)       | -1.01 | $8.23 \times 10^{-1}$ | 1.16  | $1.08 \times 10^{-2}$ |
| <i>ABL2</i>   | v-abl Abelson murine leukemia viral oncogene homolog 2 (arg, Abelson-related gene) | -1.01 | $8.34 \times 10^{-1}$ | 1.09  | $5.15 \times 10^{-2}$ |
| <i>FGF4</i>   | Fibroblast growth factor 4                                                         | -1.01 | $7.91 \times 10^{-1}$ | 1.13  | $1.70 \times 10^{-2}$ |
| <i>SSPN</i>   | Sarcospan (Kras oncogene-associated gene)                                          | -1.01 | $8.01 \times 10^{-1}$ | 1.00  | $9.41 \times 10^{-1}$ |
| <i>MOS</i>    | v-mos Moloney murine sarcoma viral oncogene homolog                                | -1.02 | $8.30 \times 10^{-1}$ | 1.03  | $6.99 \times 10^{-1}$ |



|               |                                                                                                                |       |                       |       |                       |
|---------------|----------------------------------------------------------------------------------------------------------------|-------|-----------------------|-------|-----------------------|
| <i>RAB11B</i> | RAB11B, member RAS oncogene family                                                                             | -1.02 | $8.33 \times 10^{-1}$ | -1.04 | $4.85 \times 10^{-1}$ |
| <i>RAB2B</i>  | RAB2B, member RAS oncogene family                                                                              | -1.02 | $8.57 \times 10^{-1}$ | -1.17 | $9.91 \times 10^{-2}$ |
| <i>ERAS</i>   | ES cell expressed Ras                                                                                          | -1.02 | $7.42 \times 10^{-1}$ | 1.13  | $1.49 \times 10^{-2}$ |
| <i>RGL2</i>   | ral guanine nucleotide dissociation stimulator-like 2                                                          | -1.02 | $7.53 \times 10^{-1}$ | 1.00  | $9.86 \times 10^{-1}$ |
| <i>RAB4B</i>  | RAB4B, member RAS oncogene family                                                                              | -1.02 | $6.15 \times 10^{-1}$ | 1.06  | $2.23 \times 10^{-1}$ |
| <i>RABL3</i>  | RAB, member of RAS oncogene family-like 3                                                                      | -1.02 | $8.66 \times 10^{-1}$ | 1.04  | $7.08 \times 10^{-1}$ |
| <i>RAB7B</i>  | RAB7B, member RAS oncogene family                                                                              | -1.02 | $5.44 \times 10^{-1}$ | 1.02  | $5.34 \times 10^{-1}$ |
| <i>LCK</i>    | Lymphocyte-specific protein tyrosine kinase                                                                    | -1.03 | $6.40 \times 10^{-1}$ | 1.06  | $2.08 \times 10^{-1}$ |
| <i>FEV</i>    | FEV (ETS oncogene family)                                                                                      | -1.03 | $6.62 \times 10^{-1}$ | 1.18  | $5.08 \times 10^{-3}$ |
| <i>RAB5A</i>  | RAB5A, member RAS oncogene family                                                                              | -1.03 | $7.21 \times 10^{-1}$ | -1.04 | $7.41 \times 10^{-1}$ |
| <i>NTRK1</i>  | Neurotrophic tyrosine kinase, receptor, type 1                                                                 | -1.03 | $5.13 \times 10^{-1}$ | 1.09  | $7.97 \times 10^{-2}$ |
| <i>MMEL1</i>  | Membrane metallo-endopeptidase-like 1                                                                          | -1.03 | $5.53 \times 10^{-1}$ | 1.07  | $1.92 \times 10^{-1}$ |
| <i>THPO</i>   | Thrombopoietin                                                                                                 | -1.03 | $5.85 \times 10^{-1}$ | 1.04  | $4.43 \times 10^{-1}$ |
| <i>CALCA</i>  | Calcitonin-related polypeptide alpha                                                                           | -1.03 | $5.76 \times 10^{-1}$ | 1.25  | $2.73 \times 10^{-1}$ |
| <i>BCL2</i>   | B-cell CLL/lymphoma 2                                                                                          | -1.04 | $4.97 \times 10^{-1}$ | 1.08  | $8.44 \times 10^{-2}$ |
| <i>CCND1</i>  | cyclin D1                                                                                                      | -1.04 | $6.52 \times 10^{-1}$ | 1.06  | $4.94 \times 10^{-1}$ |
| <i>ELK3</i>   | ELK3, ETS-domain protein (SRF accessory protein 2)                                                             | -1.04 | $6.50 \times 10^{-1}$ | 1.00  | $9.81 \times 10^{-1}$ |
| <i>TLX1</i>   | T-cell leukemia homeobox 1                                                                                     | -1.04 | $6.24 \times 10^{-1}$ | 1.05  | $3.92 \times 10^{-1}$ |
| <i>ERBB2</i>  | v-erb-b2 erythroblastic leukemia viral oncogene homolog 2, neuro/glioblastoma derived oncogene homolog (avian) | -1.04 | $5.39 \times 10^{-1}$ | 1.12  | $1.47 \times 10^{-2}$ |
| <i>RELA</i>   | v-rel reticuloendotheliosis viral oncogene homolog A (avian)                                                   | -1.04 | $4.91 \times 10^{-1}$ | -1.01 | $8.22 \times 10^{-1}$ |

|                |                                                                  |       |                       |       |                       |
|----------------|------------------------------------------------------------------|-------|-----------------------|-------|-----------------------|
| <i>RAB6C</i>   | RAB6C, member RAS oncogene family                                | -1.04 | $6.76 \times 10^{-1}$ | -1.25 | $1.04 \times 10^{-1}$ |
| <i>RAB36</i>   | RAB36, member RAS oncogene family                                | -1.05 | $3.46 \times 10^{-1}$ | -1.09 | $7.18 \times 10^{-2}$ |
| <i>MAS1L</i>   | MAS1 oncogene-like                                               | -1.05 | $4.83 \times 10^{-1}$ | 1.04  | $5.47 \times 10^{-1}$ |
| <i>RAB32</i>   | RAB32, member RAS oncogene family                                | -1.05 | $3.54 \times 10^{-1}$ | 1.11  | $5.44 \times 10^{-2}$ |
| <i>RAB39</i>   | RAB39, member RAS oncogene family                                | -1.05 | $4.87 \times 10^{-1}$ | 1.04  | $5.47 \times 10^{-1}$ |
| <i>MPL</i>     | Myeloproliferative leukemia virus oncogene                       | -1.06 | $1.56 \times 10^{-1}$ | -1.02 | $5.97 \times 10^{-1}$ |
| <i>RAB43</i>   | RAB43, member RAS oncogene family                                | -1.06 | $4.88 \times 10^{-1}$ | -1.00 | $9.83 \times 10^{-1}$ |
| <i>RAB40AL</i> | RAB40A, member RAS oncogene family-like                          | -1.07 | $4.55 \times 10^{-1}$ | 1.02  | $7.75 \times 10^{-1}$ |
| <i>RAP2A</i>   | RAP2A, member of RAS oncogene family                             | -1.07 | $4.17 \times 10^{-1}$ | -1.00 | $9.80 \times 10^{-1}$ |
| <i>FOXP1</i>   | Forkhead box G1                                                  | -1.07 | $1.79 \times 10^{-1}$ | 1.16  | $1.04 \times 10^{-2}$ |
| <i>RAB9B</i>   | RAB9B, member RAS oncogene family                                | -1.08 | $1.73 \times 10^{-1}$ | -1.02 | $7.98 \times 10^{-1}$ |
| <i>TCL1B</i>   | T-cell leukemia/lymphoma 1B                                      | -1.08 | $1.63 \times 10^{-1}$ | 1.11  | $1.35 \times 10^{-1}$ |
| <i>RAB41</i>   | RAB41, member RAS oncogene family                                | -1.08 | $1.18 \times 10^{-1}$ | 1.02  | $8.04 \times 10^{-1}$ |
| <i>MAFK</i>    | v-maf musculoaponeurotic fibrosarcoma oncogene homolog K (avian) | -1.09 | $2.72 \times 10^{-1}$ | 1.01  | $8.87 \times 10^{-1}$ |
| <i>BRAF</i>    | v-raf murine sarcoma viral oncogene homolog B1                   | -1.09 | $2.94 \times 10^{-1}$ | -1.08 | $4.62 \times 10^{-1}$ |
| <i>PIM3</i>    | pim-3 oncogene                                                   | -1.09 | $1.28 \times 10^{-1}$ | -1.02 | $6.60 \times 10^{-1}$ |
| <i>WNT7A</i>   | Wingless-type MMTV integration site family, member 7A            | -1.10 | $1.56 \times 10^{-1}$ | -1.01 | $7.82 \times 10^{-1}$ |
| <i>REL</i>     | v-rel reticuloendotheliosis viral oncogene homolog (avian)       | -1.10 | $3.90 \times 10^{-1}$ | -1.01 | $9.05 \times 10^{-1}$ |
| <i>CDON</i>    | Cdon homolog (mouse)                                             | -1.10 | $9.39 \times 10^{-2}$ | -1.10 | $1.27 \times 10^{-1}$ |
| <i>RAB20</i>   | RAB20, member RAS oncogene family                                | -1.10 | $1.83 \times 10^{-1}$ | 1.03  | $5.64 \times 10^{-1}$ |

|                |                                                                                                    |       |                       |       |                       |
|----------------|----------------------------------------------------------------------------------------------------|-------|-----------------------|-------|-----------------------|
| <i>MRAS</i>    | Muscle RAS oncogene homolog                                                                        | -1.11 | $3.69 \times 10^{-1}$ | -1.03 | $5.95 \times 10^{-1}$ |
| <i>CSF1R</i>   | Colony stimulating factor 1 receptor                                                               | -1.11 | $9.25 \times 10^{-2}$ | 1.02  | $6.44 \times 10^{-1}$ |
| <i>RAF1</i>    | v-raf-1 murine leukemia viral oncogene homolog 1                                                   | -1.11 | $1.74 \times 10^{-1}$ | -1.21 | $8.95 \times 10^{-3}$ |
| <i>ADRB1</i>   | Adrenergic, beta-1-, receptor                                                                      | -1.11 | $9.67 \times 10^{-2}$ | 1.08  | $2.08 \times 10^{-1}$ |
| <i>SKI</i>     | v-ski sarcoma viral oncogene homolog (avian)                                                       | -1.11 | $3.55 \times 10^{-2}$ | 1.08  | $7.68 \times 10^{-2}$ |
| <i>THRB</i>    | Thyroid hormone receptor, beta (erythroblastic leukemia viral (v-erb-a) oncogene homolog 2, avian) | -1.12 | $4.74 \times 10^{-2}$ | -1.12 | $3.33 \times 10^{-2}$ |
| <i>FRAT1</i>   | Frequently rearranged in advanced T-cell lymphomas                                                 | -1.12 | $5.73 \times 10^{-2}$ | 1.01  | $8.37 \times 10^{-1}$ |
| <i>VAV1</i>    | vav 1 guanine nucleotide exchange factor                                                           | -1.13 | $3.25 \times 10^{-2}$ | -1.00 | $9.95 \times 10^{-1}$ |
| <i>RAP1B</i>   | RAP1B, member of RAS oncogene family                                                               | -1.14 | $4.41 \times 10^{-1}$ | -1.73 | $5.82 \times 10^{-3}$ |
| <i>RAB37</i>   | RAB37, member RAS oncogene family                                                                  | -1.14 | $1.23 \times 10^{-2}$ | 1.08  | $2.00 \times 10^{-1}$ |
| <i>EEF1A1</i>  | Eukaryotic translation elongation factor 1 alpha 1                                                 | -1.14 | $2.38 \times 10^{-1}$ | -1.16 | $8.13 \times 10^{-2}$ |
| <i>RAB42</i>   | RAB42, member RAS oncogene family                                                                  | -1.14 | $1.74 \times 10^{-1}$ | -1.01 | $8.90 \times 10^{-1}$ |
| <i>ABL1</i>    | c-abl oncogene 1, receptor tyrosine kinase                                                         | -1.14 | $1.85 \times 10^{-2}$ | -1.08 | $2.07 \times 10^{-1}$ |
| <i>RABL2B</i>  | RAB, member of RAS oncogene family-like 2B                                                         | -1.15 | $1.66 \times 10^{-2}$ | -1.20 | $4.97 \times 10^{-3}$ |
| <i>MAS1</i>    | MAS1 oncogene                                                                                      | -1.15 | $3.62 \times 10^{-2}$ | 1.02  | $8.03 \times 10^{-1}$ |
| <i>FES</i>     | Feline sarcoma oncogene                                                                            | -1.16 | $6.14 \times 10^{-3}$ | -1.05 | $2.91 \times 10^{-1}$ |
| <i>EVI1</i>    | Ecotropic viral integration site 1                                                                 | -1.16 | $6.96 \times 10^{-2}$ | -1.00 | $9.99 \times 10^{-1}$ |
| <i>RAPGEF1</i> | Rap guanine nucleotide exchange factor (GEF) 1                                                     | -1.17 | $3.54 \times 10^{-2}$ | -1.15 | $2.36 \times 10^{-2}$ |
| <i>PEA15</i>   | Phosphoprotein enriched in astrocytes 15                                                           | -1.18 | $1.23 \times 10^{-1}$ | -1.26 | $5.63 \times 10^{-2}$ |
| <i>CXCL1</i>   | Chemokine (C-X-C motif) ligand 1 (melanoma growth stimulating                                      | -1.18 | $2.07 \times 10^{-1}$ | 1.14  | $2.77 \times 10^{-1}$ |

|               |                                                                                                   |       |                       |       |                       |
|---------------|---------------------------------------------------------------------------------------------------|-------|-----------------------|-------|-----------------------|
|               | activity, alpha)                                                                                  |       |                       |       |                       |
| <i>RAB40A</i> | RAB40A, member RAS oncogene family                                                                | -1.19 | $2.68 \times 10^{-3}$ | -1.05 | $3.04 \times 10^{-1}$ |
| <i>RAB31</i>  | RAB31, member RAS oncogene family                                                                 | -1.20 | $1.56 \times 10^{-1}$ | -1.09 | $4.61 \times 10^{-1}$ |
| <i>PDGFB</i>  | Platelet-derived growth factor beta polypeptide (simian sarcoma viral (v-sis) oncogene homolog)   | -1.20 | $2.55 \times 10^{-3}$ | -1.06 | $3.65 \times 10^{-1}$ |
| <i>RAP1A</i>  | RAP1A, member of RAS oncogene family                                                              | -1.21 | $6.05 \times 10^{-2}$ | -1.27 | $1.90 \times 10^{-2}$ |
| <i>ERBB4</i>  | v-erb-a erythroblastic leukemia viral oncogene homolog 4 (avian)                                  | -1.21 | $1.81 \times 10^{-3}$ | -1.01 | $9.02 \times 10^{-1}$ |
| <i>USP6</i>   | Ubiquitin specific peptidase 6 (Tre-2 oncogene)                                                   | -1.22 | $9.09 \times 10^{-3}$ | -1.10 | $1.22 \times 10^{-1}$ |
| <i>RABL2A</i> | RAB, member of RAS oncogene family-like 2A                                                        | -1.22 | $7.63 \times 10^{-3}$ | -1.24 | $7.50 \times 10^{-3}$ |
| <i>RRAS</i>   | Related RAS viral (r-ras) oncogene homolog                                                        | -1.23 | $3.91 \times 10^{-3}$ | -1.09 | $1.81 \times 10^{-1}$ |
| <i>VAV3</i>   | vav 3 guanine nucleotide exchange factor                                                          | -1.23 | $1.18 \times 10^{-2}$ | -1.27 | $7.05 \times 10^{-3}$ |
| <i>SPAG9</i>  | Sperm associated antigen 9                                                                        | -1.24 | $5.45 \times 10^{-2}$ | -1.31 | $5.09 \times 10^{-2}$ |
| <i>RHOA</i>   | ras homolog gene family, member A                                                                 | -1.24 | $3.95 \times 10^{-3}$ | -1.29 | $4.22 \times 10^{-3}$ |
| <i>RASEF</i>  | RAS and EF-hand domain containing                                                                 | -1.25 | $3.74 \times 10^{-3}$ | 1.07  | $4.46 \times 10^{-1}$ |
| <i>THRA</i>   | Thyroid hormone receptor, alpha (erythroblastic leukemia viral (v-erb-a) oncogene homolog, avian) | -1.26 | $6.05 \times 10^{-3}$ | -1.19 | $2.69 \times 10^{-2}$ |
| <i>MYBL1</i>  | v-myb myeloblastosis viral oncogene homolog (avian)-like 1                                        | -1.26 | $1.63 \times 10^{-2}$ | -1.09 | $2.27 \times 10^{-1}$ |
| <i>AXL</i>    | AXL receptor tyrosine kinase                                                                      | -1.26 | $7.17 \times 10^{-6}$ | -1.12 | $2.65 \times 10^{-2}$ |
| <i>RBM6</i>   | RNA binding motif protein 6                                                                       | -1.27 | $4.86 \times 10^{-2}$ | -1.29 | $7.04 \times 10^{-2}$ |
| <i>USP4</i>   | Ubiquitin specific peptidase 4 (proto-oncogene)                                                   | -1.28 | $2.69 \times 10^{-3}$ | -1.39 | $9.25 \times 10^{-4}$ |
| <i>RAB17</i>  | RAB17, member RAS oncogene family                                                                 | -1.30 | $1.70 \times 10^{-4}$ | 1.02  | $6.96 \times 10^{-1}$ |

|                 |                                                                  |       |                        |       |                       |
|-----------------|------------------------------------------------------------------|-------|------------------------|-------|-----------------------|
| <i>FGR</i>      | Gardner-Rasheed feline sarcoma viral (v-fgr) oncogene homolog    | -1.31 | $1.67 \times 10^{-4}$  | -1.08 | $8.29 \times 10^{-2}$ |
| <i>CXCL3</i>    | Chemokine (C-X-C motif) ligand 3                                 | -1.32 | $7.93 \times 10^{-4}$  | 1.11  | $8.52 \times 10^{-2}$ |
| <i>LYN</i>      | v-yes-1 Yamaguchi sarcoma viral related oncogene homolog         | -1.34 | $1.16 \times 10^{-2}$  | 1.02  | $8.30 \times 10^{-1}$ |
| <i>NR2F1</i>    | Nuclear receptor subfamily 2, group F, member 1                  | -1.36 | $2.47 \times 10^{-6}$  | -1.10 | $6.90 \times 10^{-2}$ |
| <i>MAP3K8</i>   | Mitogen-activated protein kinase kinase kinase 8                 | -1.36 | $7.46 \times 10^{-5}$  | -1.22 | $9.21 \times 10^{-3}$ |
| <i>FYN</i>      | FYN oncogene related to SRC, FGR, YES                            | -1.38 | $6.05 \times 10^{-4}$  | -1.62 | $3.58 \times 10^{-5}$ |
| <i>MAFF</i>     | v-maf musculoaponeurotic fibrosarcoma oncogene homolog F (avian) | -1.40 | $5.49 \times 10^{-4}$  | -1.03 | $6.47 \times 10^{-1}$ |
| <i>RAB27A</i>   | RAB27A, member RAS oncogene family                               | -1.42 | $6.41 \times 10^{-4}$  | -1.12 | $3.27 \times 10^{-1}$ |
| <i>ARHGEF12</i> | Rho guanine nucleotide exchange factor (GEF) 12                  | -1.43 | $6.51 \times 10^{-3}$  | -1.48 | $3.45 \times 10^{-2}$ |
| <i>JUND</i>     | jun D proto-oncogene                                             | -1.44 | $1.75 \times 10^{-8}$  | -1.13 | $5.28 \times 10^{-3}$ |
| <i>RHOB</i>     | ras homolog gene family, member B                                | -1.45 | $1.96 \times 10^{-7}$  | -1.08 | $2.13 \times 10^{-1}$ |
| <i>ETS2</i>     | v-ets erythroblastosis virus E26 oncogene homolog 2 (avian)      | -1.58 | $6.93 \times 10^{-6}$  | -1.43 | $1.35 \times 10^{-2}$ |
| <i>JUNB</i>     | jun B proto-oncogene                                             | -1.60 | $9.51 \times 10^{-4}$  | -1.35 | $2.70 \times 10^{-2}$ |
| <i>FER</i>      | fer (fps/fes related) tyrosine kinase                            | -1.61 | $1.72 \times 10^{-4}$  | -1.52 | $1.50 \times 10^{-3}$ |
| <i>ETS1</i>     | v-ets erythroblastosis virus E26 oncogene homolog 1 (avian)      | -1.67 | $1.63 \times 10^{-4}$  | -1.63 | $1.55 \times 10^{-4}$ |
| <i>FLI1</i>     | Friend leukemia virus integration 1                              | -1.68 | $1.69 \times 10^{-8}$  | -1.63 | $7.05 \times 10^{-6}$ |
| <i>ERG</i>      | v-ets erythroblastosis virus E26 oncogene homolog (avian)        | -1.72 | $4.38 \times 10^{-8}$  | -1.36 | $2.34 \times 10^{-3}$ |
| <i>RAB8B</i>    | RAB8B, member RAS oncogene family                                | -1.76 | $1.24 \times 10^{-3}$  | -1.92 | $3.62 \times 10^{-4}$ |
| <i>KIT</i>      | v-kit Hardy-Zuckerman 4 feline sarcoma viral oncogene homolog    | -1.84 | $2.08 \times 10^{-4}$  | -1.34 | $4.29 \times 10^{-2}$ |
| <i>AKAP13</i>   | A kinase (PRKA) anchor protein                                   | -1.87 | $3.77 \times 10^{-10}$ | -1.57 | $1.75 \times 10^{-4}$ |

|              |                                                                         |       |                       |       |                       |
|--------------|-------------------------------------------------------------------------|-------|-----------------------|-------|-----------------------|
|              | 13                                                                      |       |                       |       |                       |
| <i>AKT3</i>  | v-akt murine thymoma viral oncogene homolog 3 (protein kinase B, gamma) | -1.88 | $4.68 \times 10^{-4}$ | -1.83 | $2.81 \times 10^{-4}$ |
| <i>KLF6</i>  | Kruppel-like factor 6                                                   | -1.97 | $6.09 \times 10^{-9}$ | -1.46 | $2.99 \times 10^{-4}$ |
| <i>JUN</i>   | jun oncogene                                                            | -2.30 | $7.39 \times 10^{-9}$ | -1.72 | $1.19 \times 10^{-4}$ |
| <i>FOS</i>   | v-fos FBJ murine osteosarcoma viral oncogene homolog                    | -2.80 | $7.18 \times 10^{-7}$ | -2.02 | $9.18 \times 10^{-4}$ |
| <i>ROS1</i>  | c-ros oncogene 1 , receptor tyrosine kinase                             | -2.97 | $8.79 \times 10^{-9}$ | -1.22 | $3.44 \times 10^{-1}$ |
| <i>CXCL2</i> | Chemokine (C-X-C motif) ligand 2                                        | -3.65 | $2.45 \times 10^{-8}$ | -1.69 | $4.68 \times 10^{-4}$ |
| <i>FOSB</i>  | FBJ murine osteosarcoma viral oncogene homolog B                        | -4.65 | $1.60 \times 10^{-9}$ | -2.14 | $4.87 \times 10^{-4}$ |

**Table S5.** Differential changes in tumor suppressors

| Name           | Description                                                                                       | SCC         |                       | ADC         |                       |
|----------------|---------------------------------------------------------------------------------------------------|-------------|-----------------------|-------------|-----------------------|
|                |                                                                                                   | fold-change | p-value               | fold-change | p-value               |
| <i>DLG1</i>    | Discs, large homolog 1 ( <i>Drosophila</i> )                                                      | 2.41        | $3.46 \times 10^{-5}$ | -1.15       | $3.72 \times 10^{-1}$ |
| <i>DLGAP5</i>  | Discs, large ( <i>Drosophila</i> ) homolog-associated protein 5                                   | 2.35        | $4.22 \times 10^{-7}$ | 1.42        | $1.13 \times 10^{-4}$ |
| <i>FAT</i>     | FAT tumor suppressor homolog 1 ( <i>Drosophila</i> )                                              | 1.95        | $1.64 \times 10^{-5}$ | 1.34        | $2.29 \times 10^{-2}$ |
| <i>TRIM59</i>  | Tripartite motif-containing 59                                                                    | 1.55        | $8.23 \times 10^{-5}$ | 1.21        | $4.97 \times 10^{-6}$ |
| <i>FAT2</i>    | FAT tumor suppressor homolog 2 ( <i>Drosophila</i> )                                              | 1.52        | $3.83 \times 10^{-5}$ | 1.10        | $6.39 \times 10^{-2}$ |
| <i>SMARCB1</i> | SWI/SNF related, matrix associated, actin dependent regulator of chromatin, subfamily b, member 1 | 1.48        | $3.47 \times 10^{-5}$ | 1.10        | $1.62 \times 10^{-1}$ |
| <i>CDKN2A</i>  | Cyclin-dependent kinase inhibitor 2A (melanoma, p16, inhibits CDK4)                               | 1.32        | $2.06 \times 10^{-2}$ | 1.26        | $1.15 \times 10^{-3}$ |
| <i>TUSC3</i>   | Tumor suppressor candidate 3                                                                      | 1.29        | $4.14 \times 10^{-2}$ | -1.01       | $9.36 \times 10^{-1}$ |
| <i>ING2</i>    | Inhibitor of growth family, member 2                                                              | 1.25        | $7.19 \times 10^{-2}$ | 1.18        | $2.65 \times 10^{-1}$ |
| <i>ST13</i>    | Suppression of tumorigenicity 13 (colon carcinoma) (Hsp70 interacting protein)                    | 1.25        | $7.53 \times 10^{-2}$ | -1.10       | $4.53 \times 10^{-1}$ |
| <i>EXT1</i>    | Exostoses (multiple) 1                                                                            | 1.19        | $1.50 \times 10^{-1}$ | -1.07       | $3.64 \times 10^{-1}$ |
| <i>TP53</i>    | Tumor protein p53                                                                                 | 1.18        | $6.27 \times 10^{-2}$ | 1.09        | $1.88 \times 10^{-1}$ |
| <i>VHL</i>     | von Hippel-Lindau tumor suppressor                                                                | 1.17        | $1.60 \times 10^{-2}$ | 1.20        | $1.02 \times 10^{-3}$ |
| <i>BRCA2</i>   | Breast cancer 2, early onset                                                                      | 1.17        | $1.61 \times 10^{-2}$ | 1.02        | $6.07 \times 10^{-1}$ |
| <i>RB1</i>     | Retinoblastoma 1                                                                                  | 1.15        | $1.57 \times 10^{-1}$ | -1.40       | $1.93 \times 10^{-3}$ |
| <i>LATS1</i>   | LATS, large tumor suppressor, homolog 1 ( <i>Drosophila</i> )                                     | 1.15        | $3.78 \times 10^{-2}$ | -1.15       | $2.59 \times 10^{-2}$ |
| <i>POU6F2</i>  | POU class 6 homeobox 2                                                                            | 1.14        | $3.07 \times 10^{-2}$ | 1.10        | $1.35 \times 10^{-1}$ |
| <i>CELSR2</i>  | Cadherin, EGF LAG seven-pass G-type receptor 2 (flamingo)                                         | 1.12        | $9.52 \times 10^{-3}$ | 1.10        | $4.80 \times 10^{-3}$ |

|                |                                                          |       |                       |       |                       |
|----------------|----------------------------------------------------------|-------|-----------------------|-------|-----------------------|
|                | homolog, <i>Drosophila</i> )                             |       |                       |       |                       |
| <i>PDGFRL</i>  | Platelet-derived growth factor receptor-like             | 1.12  | $1.91 \times 10^{-1}$ | 1.15  | $1.60 \times 10^{-2}$ |
| <i>BAX</i>     | BCL2-associated X protein                                | 1.10  | $5.67 \times 10^{-2}$ | 1.21  | $4.78 \times 10^{-4}$ |
| <i>EXT2</i>    | Exostoses (multiple) 2                                   | 1.09  | $1.17 \times 10^{-1}$ | 1.00  | $9.21 \times 10^{-1}$ |
| <i>RARB</i>    | Retinoic acid receptor, beta                             | 1.09  | $2.37 \times 10^{-1}$ | -1.12 | $9.82 \times 10^{-2}$ |
| <i>ING1</i>    | Inhibitor of growth family, member 1                     | 1.08  | $1.68 \times 10^{-1}$ | 1.10  | $2.26 \times 10^{-2}$ |
| <i>FH</i>      | Fumarate hydratase                                       | 1.07  | $3.18 \times 10^{-1}$ | 1.06  | $4.42 \times 10^{-1}$ |
| <i>EAF2</i>    | ELL associated factor 2                                  | 1.07  | $3.09 \times 10^{-1}$ | 1.06  | $2.95 \times 10^{-1}$ |
| <i>ING4</i>    | Inhibitor of growth family, member 4                     | 1.07  | $2.85 \times 10^{-1}$ | -1.01 | $8.93 \times 10^{-1}$ |
| <i>FAM123B</i> | Family with sequence similarity 123B                     | 1.06  | $2.78 \times 10^{-1}$ | 1.06  | $2.86 \times 10^{-1}$ |
| <i>ST7L</i>    | Suppression of tumorigenicity 7 like                     | 1.05  | $2.52 \times 10^{-1}$ | -1.04 | $2.28 \times 10^{-1}$ |
| <i>STEAP3</i>  | STEAP family member 3                                    | 1.05  | $2.84 \times 10^{-1}$ | 1.15  | $3.35 \times 10^{-3}$ |
| <i>SMAD2</i>   | SMAD family member 2                                     | 1.04  | $7.32 \times 10^{-1}$ | 1.04  | $7.07 \times 10^{-1}$ |
| <i>FAM10A4</i> | Family with sequence similarity 10, member A4 pseudogene | 1.04  | $5.94 \times 10^{-1}$ | 1.00  | $9.97 \times 10^{-1}$ |
| <i>CEBPA</i>   | CCAAT/enhancer binding protein (C/EBP), alpha            | 1.02  | $6.95 \times 10^{-1}$ | 1.30  | $3.27 \times 10^{-5}$ |
| <i>MN1</i>     | Meningioma (disrupted in balanced translocation) 1       | 1.02  | $7.36 \times 10^{-1}$ | 1.16  | $7.45 \times 10^{-3}$ |
| <i>PTCH1</i>   | Patched homolog 1 ( <i>Drosophila</i> )                  | 1.01  | $8.18 \times 10^{-1}$ | -1.04 | $3.97 \times 10^{-1}$ |
| <i>Pinx1</i>   | PIN2-interacting protein 1                               | 1.01  | $9.32 \times 10^{-1}$ | 1.09  | $1.86 \times 10^{-1}$ |
| <i>TUSC2</i>   | Tumor suppressor candidate 2                             | 1.00  | $9.53 \times 10^{-1}$ | 1.15  | $4.09 \times 10^{-3}$ |
| <i>DLEU1</i>   | Deleted in lymphocytic leukemia 1 (non-protein coding)   | -1.00 | 1.00                  | -1.01 | $9.22 \times 10^{-1}$ |
| <i>LZTS2</i>   | Leucine zipper, putative tumor suppressor 2              | -1.00 | $9.07 \times 10^{-1}$ | 1.02  | $6.23 \times 10^{-1}$ |
| <i>GLTSCR1</i> | Glioma tumor suppressor candidate region gene 1          | -1.00 | $9.22 \times 10^{-1}$ | 1.11  | $4.39 \times 10^{-2}$ |



|                 |                                                               |       |                       |       |                       |
|-----------------|---------------------------------------------------------------|-------|-----------------------|-------|-----------------------|
| <i>CDKN1B</i>   | Cyclin-dependent kinase inhibitor 1B (p27, Kip1)              | -1.01 | $9.27 \times 10^{-1}$ | -1.09 | $3.39 \times 10^{-1}$ |
| <i>CDKN2B</i>   | Cyclin-dependent kinase inhibitor 2B (p15, inhibits CDK4)     | -1.01 | $8.38 \times 10^{-1}$ | 1.20  | $3.78 \times 10^{-3}$ |
| <i>TUSC4</i>    | Tumor suppressor candidate 4                                  | -1.02 | $6.06 \times 10^{-1}$ | 1.09  | $3.35 \times 10^{-2}$ |
| <i>OVCA2</i>    | Candidate tumor suppressor in ovarian cancer 2                | -1.03 | $4.47 \times 10^{-1}$ | 1.06  | $7.07 \times 10^{-2}$ |
| <i>ARL11</i>    | ADP-ribosylation factor-like 11                               | -1.03 | $5.57 \times 10^{-1}$ | -1.02 | $7.04 \times 10^{-1}$ |
| <i>TUSC1</i>    | Tumor suppressor candidate 1                                  | -1.04 | $4.24 \times 10^{-1}$ | 1.10  | $2.77 \times 10^{-2}$ |
| <i>RPH3AL</i>   | Rabphilin 3A-like (without C2 domains)                        | -1.05 | $2.56 \times 10^{-1}$ | 1.23  | $1.24 \times 10^{-4}$ |
| <i>RASSF5</i>   | Ras association (RalGDS/AF-6) domain family member 5          | -1.05 | $3.58 \times 10^{-1}$ | -1.04 | $5.09 \times 10^{-1}$ |
| <i>SMAD4</i>    | SMAD family member 4                                          | -1.05 | $5.53 \times 10^{-1}$ | -1.25 | $3.24 \times 10^{-2}$ |
| <i>TUSC5</i>    | Tumor suppressor candidate 5                                  | -1.06 | $4.42 \times 10^{-1}$ | 1.06  | $3.31 \times 10^{-1}$ |
| <i>CDK2AP2</i>  | Cyclin-dependent kinase 2 associated protein 2                | -1.08 | $2.48 \times 10^{-1}$ | 1.21  | $4.60 \times 10^{-4}$ |
| <i>RASSF4</i>   | Ras association (RalGDS/AF-6) domain family member 4          | -1.09 | $3.73 \times 10^{-1}$ | 1.07  | $1.88 \times 10^{-1}$ |
| <i>NKX3-1</i>   | NK3 homeobox 1                                                | -1.09 | $1.07 \times 10^{-1}$ | 1.04  | $4.59 \times 10^{-1}$ |
| <i>LZTS1</i>    | Leucine zipper, putative tumor suppressor 1                   | -1.09 | $1.90 \times 10^{-1}$ | 1.08  | $1.94 \times 10^{-1}$ |
| <i>APC</i>      | Adenomatous polyposis coli                                    | -1.09 | $3.95 \times 10^{-1}$ | -1.29 | $9.09 \times 10^{-4}$ |
| <i>PTEN</i>     | Phosphatase and tensin homolog                                | -1.09 | $3.01 \times 10^{-1}$ | -1.03 | $6.85 \times 10^{-1}$ |
| <i>CYB561D2</i> | Cytochrome b-561 domain containing 2                          | -1.10 | $1.39 \times 10^{-1}$ | 1.04  | $5.50 \times 10^{-1}$ |
| <i>VHLL</i>     | von Hippel-Lindau tumor suppressor-like                       | -1.13 | $5.81 \times 10^{-2}$ | -1.04 | $5.23 \times 10^{-1}$ |
| <i>FLCN</i>     | Folliculin                                                    | -1.13 | $2.29 \times 10^{-2}$ | 1.04  | $3.91 \times 10^{-1}$ |
| <i>RASSF1</i>   | Ras association (RalGDS/AF-6) domain family member 1          | -1.15 | $4.18 \times 10^{-2}$ | 1.06  | $1.81 \times 10^{-1}$ |
| <i>LATS2</i>    | LATS, large tumor suppressor, homolog 2 ( <i>Drosophila</i> ) | -1.15 | $2.82 \times 10^{-3}$ | 1.02  | $5.47 \times 10^{-1}$ |
| <i>RPL10</i>    | Ribosomal protein L10                                         | -1.17 | $1.78 \times 10^{-1}$ | 1.05  | $7.52 \times 10^{-1}$ |

|                |                                                                      |       |                        |       |                       |
|----------------|----------------------------------------------------------------------|-------|------------------------|-------|-----------------------|
| <i>GLTSCR2</i> | Glioma tumor suppressor candidate region gene 2                      | -1.18 | $2.94 \times 10^{-3}$  | -1.13 | $6.14 \times 10^{-2}$ |
| <i>SPI1</i>    | Spleen focus forming virus (SFFV) proviral integration oncogene spi1 | -1.20 | $4.56 \times 10^{-3}$  | 1.05  | $2.56 \times 10^{-1}$ |
| <i>HYAL1</i>   | Hyaluronoglucosaminidase 1                                           | -1.20 | $5.25 \times 10^{-4}$  | -1.10 | $4.64 \times 10^{-2}$ |
| <i>FAT3</i>    | FAT tumor suppressor homolog 3 ( <i>Drosophila</i> )                 | -1.20 | $5.88 \times 10^{-4}$  | -1.07 | $2.91 \times 10^{-1}$ |
| <i>MTUS1</i>   | Mitochondrial tumor suppressor 1                                     | -1.25 | $4.10 \times 10^{-2}$  | -1.08 | $5.09 \times 10^{-1}$ |
| <i>DCC</i>     | Deleted in colorectal carcinoma                                      | -1.27 | $1.47 \times 10^{-3}$  | -1.14 | $4.26 \times 10^{-2}$ |
| <i>FAT4</i>    | FAT tumor suppressor homolog 4 ( <i>Drosophila</i> )                 | -1.44 | $1.87 \times 10^{-7}$  | -1.43 | $3.55 \times 10^{-7}$ |
| <i>CADM1</i>   | Cell adhesion molecule 1                                             | -1.98 | $1.00 \times 10^{-7}$  | -1.24 | $3.08 \times 10^{-2}$ |
| <i>TGFBR2</i>  | Transforming growth factor, beta receptor II (70/80 kDa)             | -2.09 | $1.85 \times 10^{-11}$ | -1.81 | $2.09 \times 10^{-7}$ |
